1 **Effects of host species identity and diet on biodiversity of oral and rectal microbiomes of**  
2 **Puerto Rican bats**

3

4 Steven J. Presley<sup>1\*</sup>, Joerg Graf<sup>2</sup>, Ahmad F. Hassan<sup>2</sup>, Anna R. Sjodin<sup>1,3</sup>, and Michael R. Willig<sup>1</sup>

5

6 <sup>1</sup> Institute of the Environment, Center for Environmental Sciences & Engineering, and

7 Department of Ecology & Evolutionary Biology, University of Connecticut, Storrs,

8 Connecticut 06269-4210

9 <sup>2</sup> Department of Molecular & Cell Biology, University of Connecticut, Storrs, Connecticut

10 06269-3125

11 <sup>3</sup> Department of Biological Sciences, University of Idaho, Moscow, Idaho 83844

12

13 Running Title: Microbiome Biodiversity of Bats

14

15

16

17

18 \*Corresponding author:

19 Steven J. Presley

20 Center for Environmental Sciences and Engineering

21 University of Connecticut

22 3107 Horsebarn Hill Road

23 Storrs, CT 06269-4210

24 Phone: 860-486-1772

25 FAX: 860-486-1753

26 e-mail: [steven.presley@uconn.edu](mailto:steven.presley@uconn.edu)

27 ORCID 0000-0002-5987-0735

28

29 **Abstract**

30 Microbiomes perform vital functions for their mammalian hosts, making them potential drivers  
31 of host evolution. Understanding effects of environmental factors and host characteristics on the  
32 composition and biodiversity of microbiomes may provide novel insights into the origin and  
33 maintenance of these symbiotic relationships. Our goals were to (1) characterize biodiversity of  
34 oral and rectal microbiomes of bats in Puerto Rico; and (2) determine the effects of geographic  
35 location and host characteristics on that biodiversity. We collected bats and their microbiomes  
36 from 3 sites, and used 4 metrics (species richness, Shannon diversity, Camargo evenness,  
37 Berger-Parker dominance) to characterize biodiversity. We evaluated the relative importance of  
38 site, host sex, host species identity, and host foraging guild on microbiome biodiversity.  
39 Microbiome biodiversity was highly variable among conspecifics. Geographical location  
40 exhibited consistent effects, whereas host sex did not do so. Within each host guild, host species  
41 exhibited consistent differences in oral and rectal microbiome biodiversity. Oral microbiome  
42 biodiversity was indistinguishable between guilds, whereas rectal microbiome biodiversity was  
43 significantly greater in carnivores than in herbivores. The high intraspecific and spatial variation  
44 in microbiome biodiversity necessitate a large number of samples to isolate the effects of  
45 environmental or host characteristics on microbiomes. Species-specific biodiversity of oral  
46 microbiomes suggests these communities are structured by direct interactions with the host  
47 immune system via epithelial receptors. In contrast, the number of microbial taxa that a host gut  
48 supports may be contingent on the number and kinds of functions a host requires of its  
49 microbiome.

50

51

52 **Keywords**

53 Chiroptera, Mormoopidae, Phyllostomidae, spatial variation, Vespertilionidae

54

55

56 **INTRODUCTION**

57 Microbiomes perform vital functions for their mammalian hosts, including nutrient acquisition,  
58 pathogen defense, and immune development [1–3]. This suggests that microbiomes may be  
59 important drivers of host evolution, affecting their physiology, immunocompetence, diet, and  
60 ultimately fitness [4]. Moreover, aspects of mammalian physiology, anatomy, behavior, diet, and  
61 niche affect which microbes encounter particular host habitats (e.g. skin, oral cavity,  
62 gastrointestinal tract). Consequently, these symbiotic associations likely represent co-  
63 evolutionary relationships [5, 6].

64       Understanding effects of environmental factors and host characteristics on the  
65 composition and biodiversity of microbiomes may provide novel insights into the origin and  
66 maintenance of symbiotic relationships. Indeed, host phylogeny, host diet, and environmental  
67 characteristics are the primary candidates likely to affect variation in microbiome composition or  
68 biodiversity [7–11]. Host phylogeny is a particularly attractive explanation as it forms the basis  
69 for coevolutionary dynamics. Because organisms evolve via descent with modification,  
70 phylogenetic inertia gives rise to a priori expectations that more closely related species will be  
71 more similar (from genetic, functional, behavioral, anatomical, and physiological perspectives),  
72 and that more distantly related species will be less similar [12]. Consequently, host phylogeny  
73 may be an effective proxy for combinations of host characteristics that affect the composition

74 and biodiversity of microbiomes rather than an explanatory mechanism for variation among  
75 hosts in aspects of their microbiome per se.

76 Host diet has been a focal point for understanding microbiome composition and  
77 biodiversity, especially for gastrointestinal microbiomes, which facilitate digestive processes and  
78 are directly exposed to the ingested food. Consequently, intra- or inter-specific differences in  
79 host diet may result in differences in gastrointestinal microbiomes due to exposure (i.e. animals  
80 with similar diets may consume similar microbiota) or due to the digestive functions provided by  
81 the microbiota [9, 13]. In addition, hosts that live in similar environments may be exposed to  
82 similar microbiota, resulting in similar microbiome composition or biodiversity [13]. Important  
83 aspects of the environment that may affect microbiome composition and biodiversity include  
84 host abundance and community composition, as well as ambient environmental characteristic s  
85 (e.g. roost type, habitat type, and abiotic factors).

86 Studies typically consider samples from intestinal contents, intestinal linings, or feces to  
87 represent the same microbial communities [9, 14, 15]. Nonetheless, microbiomes isolated from  
88 the mucosal layer of the intestines are distinct from those isolated from feces or intestinal  
89 contents [14]. Moreover, variation among microbiomes from the intestinal mucosa are closely  
90 associated with host evolutionary relationships, whereas variation in fecal microbiomes are  
91 closely associated with dietary variation among hosts [14].

92

### 93 **Bats as microbiome hosts**

94 Bats are an ideal model taxon for the study of variation in microbiome biodiversity [14]. They  
95 compose the 2<sup>nd</sup> most species-rich order of mammals, and are nearly cosmopolitan, occurring  
96 everywhere but the Arctic, Antarctica, and a few small oceanic islands [16]. In addition, bats are

97 locally abundant, live in close proximity to humans, travel long distances to forage or between  
98 winter and summer ranges, and are functionally diverse [17, 18]. Moreover, bats are important  
99 agents of pollination, seed dispersal, and pest control [19, 20], and exhibit specializations to  
100 forage on nectar, fruit, insects, fish, small vertebrates, and blood [17, 18, 21, 22]. As with other  
101 mammals, functional traits and behaviors are evolutionarily conserved in bats, often confounding  
102 the ability to evaluate independent effects of diet or phylogeny on ecological patterns [23].

103         Understanding bat microbiome composition and diversity may be especially important  
104 because bats often live in proximity to humans [24] and are reservoirs or vectors for many well-  
105 known zoonoses [25–29]. Their presence in settlements affects infection rates of diseases in  
106 humans [30]. Bats use many human-dominated habitats: they feed on fruits in orchards, forage  
107 for insects around streetlights, and use buildings for maternity colonies, roosts, and hibernacula  
108 [24]. In addition, bats are highly vagile and capable of traveling long distances in a single night.  
109 This creates opportunities for exposure to novel microbes and to enhance dispersal [31]. In  
110 addition, microbiomes may drive host evolution, physiology, and fitness [2]. For example, the  
111 successful evolution of new dietary strategies within a clade (e.g. the diversification of  
112 herbivorous strategies within the Phyllostomidae) may be contingent of the functional diversity  
113 of their associated microbiomes. Finally, the digestive physiology of flying vertebrates (bats and  
114 birds) differ from that of other vertebrates [32], including reliance on paracellular glucose  
115 absorption, resulting in different mechanisms structuring the microbiomes of bats and birds than  
116 in terrestrial vertebrate groups.

117         Thirteen species of bat occur on Puerto Rico [33], including 7 insectivores (*Eptesicus*  
118 *fuscus*, *Lasiurus borealis*, *Molossus molossus*, *Mormoops blainvillii*, *Pteronotus quadridens*, *P.*  
119 *parnellii*, *Tadarida brasiliensis*), a piscivore (*Noctilio leporinus*), a nectarivore (*Monophyllus*

120 *redmani*), 2 frugivores (*Artibeus jamaicensis*, *Stenoderma rufum*), and 2 generalist herbivores  
121 (*Brachyphylla cavernarum*, *Erophylla sezekorni*). Bats that consume fruit, nectar, flowers, or  
122 pollen typically have diverse herbivorous diets that differ in preferred dietary items, with *M.*  
123 *redmani* being primarily nectarivorous, *A. jamaicensis* and *S. rufum* being primarily frugivorous,  
124 and *E. sezekorni* and *B. cavernarum* being generalist herbivores [33]. The insectivores belong to  
125 3 families (Vespertilionidae, Molossidae, and Mormoopidae); the piscivore is a noctilionid; and  
126 phyllostomids consume fruit, flowers, pollen, or nectar. The Noctilionidae, Mormoopidae, and  
127 Phyllostomidae are members of the Noctilionoidea superfamily, whereas the Vespertilionidae  
128 and Molossidae are members of the Vespertilionoidea superfamily [34]. These systematic  
129 relationships decouple insectivory from phylogeny and may help disentangle the relative effects  
130 of evolutionary history and ecological function as drivers of microbiome composition and  
131 diversity. We grouped bats into broad foraging guilds (carnivores and herbivores) to evaluate  
132 effects of general diet on microbiome biodiversity.

133

#### 134 **Host environments**

135 Oral microbiomes provide benefits to the host, including prevention of infection by exogenous  
136 microorganisms, regulation of immune responses, and the conversion of dietary nitrates into  
137 nitrites that improve vascular health and stimulate gastric mucus production [35, 36]. The oral  
138 environment (e.g. pH, saliva, temperature, nutrient sources, aerobic conditions) determines  
139 which microbes colonize and become minor or major components of the oral microbiome [37].  
140 In addition, the microbiome can modify the environment, facilitating or preventing establishment  
141 by other microbes. Despite the importance of oral microbiomes to their hosts, they have rarely

142 been studied in wild animals (but see [15]) even though such studies are critical for advancing  
143 evolutionary ecology in general [38].

144         Studies rarely have sufficient sample sizes from multiple locations, species, or foraging  
145 guilds to powerfully and simultaneously address multiple factors that affect microbiome  
146 composition or biodiversity in bats (but see [15]). Moreover, studies are lacking that  
147 simultaneous consider effects of environmental and host factors on microbiomes from multiple  
148 sources (e.g. oral cavity). To address these issues, we collected oral and rectal samples from bats  
149 captured at three locations (hereafter called “sites”) in Puerto Rico. We evaluated the relative  
150 importance of site, host sex, host species identity, and host foraging guild on microbiome  
151 biodiversity from oral and rectal samples. We used a hierarchical analytical design to evaluate  
152 these factors (Fig. 1). First, for each host species with sufficient sample sizes from multiple  
153 caves, we evaluated effects of site (i.e. host population) and host sex on microbiome biodiversity.  
154 Second, we evaluated the effect of host species identity on microbiome biodiversity separately  
155 for bats within each of two broadly defined foraging guilds. Finally, we evaluated the effect of  
156 host foraging guild (carnivores versus herbivores) on microbiome biodiversity.

157         We expected factors that mold patterns in oral microbiomes to be different from those  
158 that mold such patterns in rectal microbiomes. More specifically, we expected dietary guild to  
159 have a larger impact on the biodiversity of rectal microbiomes than on that of oral microbiomes  
160 because sources of nutrients and energy (fats, carbohydrates, proteins) have a dominant effect on  
161 the composition and diversity of microbiomes associated with the digestive tract [8]. In contrast,  
162 we expected biodiversity of the oral microbiome, but not that of the rectal microbiome, to  
163 respond to host species identity and geographical site because oral microbiomes are affected

164 primarily by the interactions with the epithelia and exposure to local habitats (e.g. roost  
165 locations, animals that share a roost, hot cave versus cold cave).

166

## 167 **METHODS**

### 168 **Study area and sample collection**

169 Field work was conducted at three sites (Mata de Plátano, Río Encantado, and Aguas Buenas) in  
170 Puerto Rico (Fig. 2), Each is in an area characterized by limestone formations (karst region), in  
171 which weathering has produced ridges, towers, fissures, sinkholes, and caves throughout the  
172 landscape. Although bats captured in a location may not be roosting in a single cave, all are  
173 using the same habitats and resources, meeting the criteria for a population.

174         The majority of sampling was conducted on the Mata de Plátano Nature Reserve  
175 (operated by InterAmerican University, Bayamon, Puerto Rico) in north-central Puerto Rico (18°  
176 24.87' N, 66° 43.53' W). Mata de Plátano harbors two adjacent, well-studied caves (Culebrones  
177 and Larva). Culebrones is a structurally complex hot cave, with temperatures reaching 40 °C and  
178 relative humidity at 100%. It is home to about 300,000 bats representing six species [39]: three  
179 carnivores (*P. quadridens*, *P. parnellii*, *M. blainvillii*) and three herbivores (*M. redmani*, *E.*  
180 *sezekorni*, *B. cavernarum*). Bats were sampled at Culebrones for 28 nights from June to August  
181 2017. A harp trap was placed at sunset immediately outside the cave opening and monitored  
182 continually until the maximum number of bats that could be processed in a single night was  
183 captured. The harp trap was used at Culebrones because the cave has a single, small opening,  
184 that funnels hundreds of thousands of bats through a small space as bats emerge during and after  
185 sunset.



186 Larva is a cold cave that is much smaller, cooler, and less structurally complex than  
187 Culebrones. Only a small number of bats (30-200) representing two species (*A. jamaicensis* and  
188 *E. fuscus*) roost in the cave. Bats were sampled from Larva on seven occasions from June to  
189 August of 2017, using two different techniques. After sunset, mist nets were placed along a trail  
190 outside of the cave entrance and were checked at least every ten minutes. Because few  
191 individuals were captured with mist nets, hand nets were used to capture bats inside the cave to  
192 increase sample sizes.

193 Río Encantado is home to Ramon Cave (18° 21.41' N, 66° 32.36' W), a large, cool cave  
194 known to support a single bat species, *A. jamaicensis* [33]. The cave is 10 km southeast of Mata  
195 de Plátano and is associated with an extensive underground river system. The underground river  
196 has many openings throughout its range, but only a single opening exists at this location.  
197 Habitats surrounding Ramon Cave are owned and protected by a non-profit organization (Para la  
198 Naturaleza). Bats were sampled at Río Encantado on six nights during July of 2017. A harp trap  
199 was placed near the cave entrance and mist nets were placed along the trail leading to the cave.  
200 Harp traps were monitored continually, and mist nets were checked at least every 10 minutes.  
201 Bats were captured from sunset until the maximum number of bats that could be processed in a  
202 single night was collected.

203 Aguas Buenas is a cool cave that is located 70 km southeast of Mata de Plátano (18°  
204 14.01' N, 66° 6.30' W). *Artibeus jamaicensis*, *B. cavernarum*, *M. redmani*, *P. quadridens*, *E.*  
205 *fuscus*, and *L. borealis* have been recorded roosting in or flying near the cave [33]. Bats were  
206 captured at Aguas Buenas on four nights in July and August of 2017. The entrance to the cave is  
207 not easily accessible, as it is elevated above ground-level and blocked by a river. Consequently,  
208 bats were captured using mist nets at each of the two major flyways from the cave: along the trail

209 to the cave and across the river outside of the cave. Nets were opened at sunset and monitored at  
210 least every 10 minutes until approximately 01:00 or until the maximum number of bats that  
211 could be processed in a single night was collected.

212 Species identity, sex, reproductive status and mass were determined for each captured  
213 individual prior to placement in a cotton holding bag. Separate, clean cotton-tipped swabs were  
214 used to collect saliva from the mouth or feces from the rectum and anal region of each bat.  
215 Swabs were placed in individual cryovials and sent to the University of Connecticut at -80 °C in  
216 a dry ice shipper. All methods were approved by the University of Connecticut Institutional  
217 Animal Care and Use Committee (IACUC, protocol A15-032).

218

## 219 **Microbiome Analysis**

220 DNA was extracted using DNeasy PowerSoil kit (Qiagen). Swabs were shaved off to maximize  
221 DNA output using sterile surgical blades, carbon steel, Size 15 (Bard-Parker). The DNeasy  
222 PowerSoil protocol was followed, but instead of vortexing the bead tubes a PowerLyzer 24 was  
223 used (45 seconds at 2,000 RPM for 1 cycle) (Qiagen). The DNeasy PowerSoil extraction was  
224 performed using a QIAcube (Qiagen).

225 The hypervariable V4 region of the 16S rRNA gene was amplified to characterize the  
226 microbiome [40]. The universal 16S primers 515F/806R were used to PCR amplify the V4  
227 region [41]. PCR was performed in triplicate, each reaction with a total volume of 25  $\mu$ L. Each  
228 reaction contained 12.5  $\mu$ L Phusion High-Fidelity PCR Master Mix with HF Buffer 2X  
229 concentration and 1  $\mu$ L bovine serum albumin 20 mg/ml (New England BioLabs), 0.75  $\mu$ L  
230 forward primer 10  $\mu$ M, 0.75  $\mu$ L reverse primer 10  $\mu$ M, and 10  $\mu$ L of DNA/molecular grade  
231 water. A total of 10 ng DNA was added per reaction. Thermocycler parameters were: denaturing

232 step at 95 °C for 3 min, followed by 30 cycles of 95 °C for 45 s, 50 °C for 60 s, 72 °C for 90 s,  
233 and an extension step of 72 °C for 10 min. Subsequently, QIAxcel capillary electrophoresis  
234 (Qiagen) was utilized to assess presence of PCR product and determine the V4 band  
235 concentration for library pooling. PCR samples with similar concentrations (< 5 ng/μL, 5-10  
236 ng/μL, > 10 ng/μL) were pooled together. Libraries clean-up was performed using GeneRead  
237 Size Selection kit (Qiagen). Libraries were sequenced on an Illumina MiSeq at the UConn  
238 Microbial Analysis, Resources, and Services facility. The reads were demultiplexed using the  
239 Illumina BaseSpace sequence hub and FASTQ files were downloaded for further data analysis.

240 Data was analyzed in R [42] using the dada2 package [43] to process data and generate  
241 Amplified Sequence Variants (ASV) and taxonomy tables. The forward and reverse reads were  
242 trimmed to 240 and 200 bp, respectively, and truncated using Q=11 and no Ns were allowed.  
243 The taxonomy was assigned to each ASV using silva\_nr\_v128. The phangorn package [44] was  
244 used to generate phylogenetic trees from ASV tables. Further analyses and sample filtering were  
245 performed in phyloseq [44]. Using the rarefy\_even\_depth function in phyloseq, microbiome  
246 count data were rarefied to sequencing depths of 1,000, 5,000, and 10,000 reads. Data were  
247 rarefied to these three levels to optimize microbiome sampling completeness, while trying to  
248 maximize sample sizes for analyses of effects related to host sex, host species, host guild, and  
249 geographical location. A sequencing depth of 1,000 reads was selected as minimum depth to  
250 retain the greatest number of samples for analyses, but this level discards a large amount of data  
251 from many samples and may include samples that are relatively poorly characterized. Increasing  
252 sequencing depth reduces the number of samples that meet the minimum requirements, resulting  
253 in reduced statistical power, but increases the relative completeness and number of rare ASVs

254 included in samples. This represents a trade-off of statistical power for confidence in the  
255 characterization of the microbiome samples.

256

## 257 **Quantitative Analysis**

258 Separately for oral and rectal samples from each host individual, we quantified microbiome  
259 biodiversity using four metrics based on ASVs: richness, Shannon diversity [46], Camargo's  
260 evenness [47], and Berger-Parker dominance [48]. Hereafter, we refer to these metrics simply as  
261 "richness", "diversity", "evenness", and "dominance", and use "biodiversity" to refer to the  
262 general concept that comprises all 4 metrics. Each metric was expressed as Hill numbers, which  
263 are transformations based on relative abundances [48, 49]. Within the context of ASVs, Hill  
264 numbers are based on the relative number of reads that represent each ASV. Importantly, Hill  
265 numbers for all metrics are on the same scale (i.e. from 1 to richness) and in the same units  
266 (effective number of ASVs), which is defined as the number of equally abundant ASVs required  
267 to achieve the empirical value of a metric. Greater values for any Hill number represent greater  
268 biodiversity, including for dominance (i.e. larger values for Hill-transformed dominance indicate  
269 low dominance and greater biodiversity).

270 We used a 2-way analysis of variance (ANOVA) with type II sums of squares to evaluate  
271 effects of site (i.e. host population) and host sex for each host species that was represented by  
272 more than 1 population. Site and host sex were model I (fixed) treatment factors. *Artibeus*  
273 *jamaicensis* was captured at all three caves; *B. cavernarum*, *E. sezekorni* and *P. quadridens* were  
274 captured at Mata de Plátano and Río Encantado; and *M. redmani* was captured at Mata de  
275 Plátano and Aguas Buenas. For each host species without sufficient samples from multiple  
276 caves, but with samples for each sex, we used a general linear model (GLMM) to evaluate

277 differences in microbiome biodiversity between males and females with host sex as a fixed effect  
278 and site as a random factor (i.e. model II treatment factor). Use of site as a random factor  
279 controlled for geographic variation to more powerfully evaluate differences between sexes in  
280 microbiome biodiversity

281 We used GLMMs to evaluate differences in microbiome biodiversity among host species  
282 for each guild (i.e. only among carnivorous species and only among herbivorous species) and  
283 between host guilds. Host species or host guild was a fixed effect and site was modeled as a  
284 random factor. Use of site as a random factor controlled for geographic variation to more  
285 powerfully evaluate species- or guild-level differences in microbiome biodiversity. For each  
286 GLMM that identified a significant difference in microbiome biodiversity between host species  
287 with a guild, we conducted a posteriori tests (Tukey's test with a Holm-Šidák adjustment) to  
288 identify consistent differences between all possible pairs of host species. Because such a  
289 posteriori tests are less powerful than their associated GLMM and are protected in the sense that  
290 a posteriori tests were only executed when GLMMs were significant ( $\alpha \leq 0.05$ ), we considered  $P$   
291  $\leq 0.10$  as evidence for significant pairwise differences.

292 For all analytical approaches, oral and rectal microbiomes were evaluated separately for  
293 each sequencing depth (i.e. 1,000, 5,000, and 10,000 reads) and analyses were conducted  
294 separately for each metric of biodiversity. For analyses based on host foraging guild, all host  
295 species were included to best represent variation associated with all carnivorous or herbivorous  
296 hosts. Because sample sizes decreased with increasing sequencing depth, the number of host  
297 species sometimes declined with greater sequencing depth.

298

299 **Accession Number**

300 Sequencing data of V4 region of the 16S rRNA gene has been deposited in the NCBI Short Read  
301 Archive database under BioProject PRJNA602518 and accession numbers SRX7587313-  
302 7587772.

303

## 304 **RESULTS**

305 Oral and rectal samples were collected from 331 individual bats, representing 10 species: 3  
306 insectivorous mormoopids (*M. blainvillii*, *P. quadridens*, *P. parnellii*), 1 insectivorous  
307 vespertilionid (*E. fuscus*), 1 piscivorous noctilionid (*N. leporinus*), 2 frugivorous phyllostomids  
308 (*A. jamaicensis*, *S. rufum*), 1 nectarivorous phyllostomid (*M. redmani*), and 2 generalist  
309 herbivore phyllostomid (*B. cavernarum*, *E. sezekorni*). Samples were obtained from 10 bat  
310 species at Mata de Plátano (155 individuals), 9 species (all but *S. rufum*) at Río Encantado (101  
311 individuals), and 6 species (75 individuals) at Aguas Buenas (*P. parnellii*, *N. leporinus*, *A.*  
312 *jamaicensis*, *M. redmani*, *B. cavernarum*, and *E. sezekorni*). As the bats were released after  
313 sampling, we used swabs to sample microbiomes, especially for the smaller species whose size  
314 made it challenging to extract sufficient amounts of microbial DNA for analysis. We obtained  
315 reasonable representation of the microbiomes (i.e. sequence depths > 1,000 reads) from less than  
316 half of those samples. Specifically, 136, 111, and 94 oral samples yielded sequencing depths of  
317 at least 1,000, 5,000, and 10,000 reads, respectively; and 157, 122, and 106 rectal samples  
318 yielded sequencing depths of at least 1,000, 5,000, and 10,000 reads, respectively.

319 Oral microbiomes comprised 2,114, 2,282, and 1,973 ASVs in samples with sequencing  
320 depths of 1,000, 5,000, and 10,000 reads, respectively. Rectal microbiomes comprised 2,986,  
321 4,035, and 4,026 ASVs in samples with sequencing depths of 1,000, 5,000, and 10,000 reads,

322 respectively. The reduction in number of ASVs between sequencing depths of 5,000 and 10,000  
323 is due to the smaller number of samples available for analysis.

324 Bacteria represented over 98.8% of the ASVs in oral and rectal microbiomes from each  
325 host species. Archaea comprised the remainder of the microbiomes, occurring in the oral  
326 microbiomes of 8 of 10 host species (all but *N. leporinus* and *S. rufum*) and in the rectal  
327 microbiomes of 9 of 10 host species (all but *S. rufum*).

328 In aggregate, 37 and 36 phyla were identified from oral and rectal microbiomes,  
329 respectively; however, most of these taxa were represented by few ASVs and few reads of those  
330 ASVs. Only 16 and 14 phyla were represented by at least 5 ASVs from oral and rectal samples,  
331 respectively. Oral microbiomes were dominated by Actinobacteria (30.6% of all reads),  
332 Bacteroidetes (15.4%), and Firmicutes (29.2%). Actinobacteria was the most abundant phylum  
333 in oral microbiomes of 5 host species, including all 3 mormoopids, and 2 phyllostomids (a  
334 nectarivore and frugivore), whereas Firmicutes was the most abundant phylum in oral  
335 microbiomes of the remaining 5 host species, including the noctilionid, vespertilionid, and 3  
336 phyllostomids (a frugivore and 2 generalist herbivores).

337 Rectal microbiomes were dominated by Actinobacteria (15.9% of all reads),  
338 Bacteroidetes (9.8%), Firmicutes (19.2%), and Proteobacteria (43.3%). The dominant phylum in  
339 rectal microbiomes (Proteobacteria) represented only 0.4% of oral microbiomes, but was the  
340 most abundant phylum in the rectal microbiomes of 9 host species, except for *E. fuscus*, for  
341 which Actinobacteria was the most abundant taxon.

342 Biodiversity was highly variable among individuals within each host species regardless  
343 of sequencing depth. Using sequencing depth of 1,000 as an example, maximum richness from  
344 an individual host for oral microbiomes was 3 to 38 (mean of 11) times greater than the

345 minimum richness within host species. Similarly, maximum richness of rectal microbiomes from  
346 an individual host was 3 to 33 (mean of 9) times greater than the minimum within host species.  
347 Similar variation was observed within each host species for oral diversity (maximum 3 to 56  
348 times that of the minimum, with a mean of 17) rectal diversity (maximum 3 to 57 times that of  
349 the minimum, with a mean of 20), oral evenness (maximum 2 to 55 times that of the minimum,  
350 with a mean of 17), rectal evenness (maximum 3 to 58 times that of the minimum, with a mean  
351 of 21), oral dominance (maximum 2 to 18 times that of the minimum, with a mean of 7), and  
352 rectal dominance (maximum 2 to 11 times that of the minimum, with a mean of 6).

353 The oral microbiome exhibited greater biodiversity than did the rectal microbiome in four  
354 host species, including 2 insectivorous mormoopids (*M. blainvillii* and *P. parnellii*) that harbor  
355 high microbiome biodiversity and 2 frugivorous phyllostomids (*A. jamaicensis* and *E. sezekorni*)  
356 that harbor low microbiome biodiversity (Table 1). In general, biodiversity of the more  
357 biodiverse microbiome (oral or rectal) was less than twice as great as its companion microbiome;  
358 however, *E. fuscus* (an insectivore) harbored rectal microbiomes that were more than 4 times as  
359 biodiverse as its oral microbiomes.

360 As expected, microbiome biodiversity increased as sequencing depth increased (Table 1).  
361 Insectivores had both the least (*E. fuscus*) and greatest (*Pteronotus* spp.) oral microbiome  
362 biodiversity. In contrast, frugivores (*A. jamaicensis*, *E. sezekorni*) had the least rectal  
363 microbiome biodiversity, and nectarivores (*M. redmani*) and insectivores (*Pteronotus* spp.) had  
364 the greatest rectal microbiome biodiversity (Table 1).

365 Host sex did not exhibit effects on oral or rectal microbiome richness (Table 2); however,  
366 at least one effect of sex on oral microbiome diversity, evenness, or dominance was found in *B.*  
367 *cavernarum* and on rectal microbiome diversity, evenness, or dominance in *M. blainvillii*, *P.*



368 *quadridens*, and *A. jamaicensis* (Table 2). Consistent effects of site on oral microbiomes only  
369 manifested for *A. jamaicensis*, which had the greatest number of samples. At least one metric of  
370 rectal microbiome biodiversity responded to site for *A. jamaicensis* (richness), *E. sezekorni*  
371 (richness, evenness, and dominance), and *P. quadridens* (richness, diversity, evenness, and  
372 dominance) (Table 2). Oral and rectal microbiome biodiversity was greater from *A. jamaicensis*  
373 at Río Encantado than from *A. jamaicensis* at Mata de Plátano or Aguas Buenas (Fig. 3). For host  
374 species (*B. cavernarum*, *E. sezekorni* and *P. quadridens*) with sufficient sample sizes only at Río  
375 Encantado and Mata de Plátano, differences in oral microbiome biodiversity did not manifest  
376 between sites; however, rectal microbiome biodiversity was typically greater at Río Encantado  
377 than at Mata de Plátano (Fig. 4). Microbiome biodiversity from *M. redmani* did not differ  
378 between sites.

379         Within each host guild, host species differed in oral microbiome biodiversity at each  
380 sequence depth; however, interspecific host differences in rectal microbiome biodiversity  
381 decreased with increasing sequence depth. We have stronger evidence for consistent species-  
382 specific differences in oral microbiome biodiversity within each guild than for species-specific  
383 difference in rectal microbiome biodiversity within each guild (Table S1). In contrast, no  
384 evidence suggests that guild-specific differences in oral microbiome biodiversity exist, whereas  
385 rectal microbiome biodiversity differed significantly between guilds (Table 3). Rectal  
386 microbiome biodiversity in carnivores was about twice that found in herbivores (Table 1; Fig. 5).

387

## 388 **DISCUSSION**

389 Considerable intraspecific variation characterized microbiome biodiversity, even after  
390 controlling for geography or sex of the host individual. These results mirror those for fecal and

391 gastrointestinal microbiomes from vespertilionid bats of Slovenia [51] and from emballonurid,  
392 molossids, mormoopid, phyllostomid, and vespertilionid bats from Costa Rica [14], for which  
393 variation among conspecific hosts was high. This suggests that studies relying on a few samples  
394 per host species [9, 13] do not accurately capture variation in microbiome biodiversity or  
395 composition that naturally occurs within populations. Consequently, ecological conclusions  
396 based on such small samples may not be reliable, as estimates of biodiversity may not be  
397 accurate (especially richness) and statistical power to detect differences in any metric would be  
398 quite low.

399         Greater microbiome biodiversity in a host species could arise in two ways: 1) an increase  
400 in the number of Phyla or Classes of microbes found in the microbiome, or 2) an increase in the  
401 number of ASVs that belong to the same Phyla or Classes of microbes (i.e. not an increase in  
402 higher level taxonomic biodiversity). For both oral and rectal microbiomes, the latter scenario  
403 occurred. Host species with greater microbiome biodiversity (e.g. *P. parnellii*, *P. quadridens*, *M.*  
404 *redmani*) typically harbored more ASVs belonging to the same Phyla as those present in hosts  
405 with low microbiomes biodiversity. Archaea richness and Bacteria richness at the host species  
406 level (i.e. data combined for all hosts belonging to the same species) were highly correlated (oral,  
407  $R = 0.928$ ,  $P < 0.001$ ; rectal,  $R = 0.690$ ;  $P = 0.027$ ). Similarly, pairwise correlations between  
408 richness values of different Phyla at the host species level indicate positive associations  
409 predominate (i.e. an increase in microbiome richness is associated with an increase in richness  
410 for most of the Phyla present). In oral microbiomes, 70% of pairwise correlations of Phylum  
411 relative abundances at the host species level were strongly positive ( $R > 0.50$ ), and in rectal  
412 microbiomes 56% of pairwise correlations of Phylum abundances at the host species level were

413 strongly positive ( $R > 0.50$ ). Such correlations also characterize vespertilionid, rhinolophid, and  
414 miniopterid bats from Slovenia [51].

415

#### 416 **Effects of host sex**

417 Host sex could affect microbiome biodiversity of bat hosts due to differences in social  
418 organization or diet. Harems, comprising several adult females with 1 adult male, are common  
419 social structures for noctilionid [52] and phyllostomid bats [53], whereas maternity colonies,  
420 comprising adult females and their offspring, are common in mormoopid [54] and vespertilionid  
421 [55] bats. In contrast, most adult males are solitary in both of these social systems. In addition,  
422 the diets of male and female bats differ during some seasons, especially during periods of  
423 pregnancy and lactation when females target food sources that are higher in energy and protein  
424 [56,57]. Despite sampling during the reproductive season, when these sex-based ecological  
425 differences manifest most strongly, we found little evidence of differences between sexes based  
426 on oral or rectal microbiome biodiversity (Table 2). When evidence of differences in microbiome  
427 biodiversity did manifest (i.e. in oral microbiomes of *B. cavernarum* and rectal microbiomes of  
428 *A. jamaicensis*), those differences were in the relative abundances of the ASVs (diversity,  
429 evenness, or dominance) in the microbiomes and not in the number of ASVs (richness). Fecal  
430 microbiomes from 12 species of vespertilionid bat from Slovenia failed to reveal differences  
431 between the sexes [51].

432

#### 433 **Effects of geographical location**

434 Despite the potential for environmental factors (e.g. roost environment, abundance and diversity  
435 of hosts in the roost) to affect oral microbiome biodiversity, only *A. jamaicensis* exhibited site-

436 specific differences in oral microbiome biodiversity (Table 2; Figs 2 & 3). These differences  
437 may be related to population size or to host species diversity in associated roosts. Oral  
438 microbiomes from *A. jamaicensis* in Río Encantado had the greatest biodiversity, whereas those  
439 from Mata de Plátano (Larva Cave) had the lowest biodiversity. The population of *A.*  
440 *jamaicensis* at Río Encantado was greater than at other locations, and especially compared to  
441 Mata de Plátano. Moreover, the number of bats and bat species was much greater at other caves  
442 than at Larva, where *A. jamaicensis* roosts at Mata de Plátano. Of course, populations sizes  
443 differed among sites for other host species without significant differences in oral microbiome  
444 biodiversity. This suggests that host abundance may not be the major factor determining oral  
445 microbiome biodiversity. In general, intraspecific variation in oral microbiome composition and  
446 biodiversity is high and may rival interspecific variation.

447         Rectal microbiomes of each host species exhibited site-specific variation in biodiversity  
448 (Table 2; Figs 2 & 3). In *A. jamaicensis*, rectal microbiomes exhibited patterns similar to those  
449 observed for oral microbiomes, with greater biodiversity associated with larger populations from  
450 roosts with greater bat species richness. In contrast, rectal microbiomes from *E. sezekorni* and *P.*  
451 *quadridens* exhibited greater biodiversity from Río Encantado than from Mata de Plátano, with  
452 the former harboring fewer individuals than the latter. Host abundance or biodiversity may not  
453 have direct effects on microbiome biodiversity, but may serve as proxies for important ecological  
454 factors. For example, bat abundance or diversity may be related to the diversity or abundance of  
455 dietary items or habitat types used by resident bats, and the diversity of diet or habitat may  
456 influence spatial patterns of microbiome biodiversity. Alternatively, microbiome biodiversity  
457 within sites may represent legacies or factors such as the effects of hurricane-induced  
458 disturbances on bat populations and communities [39]. Although confident identification of

459 causal mechanisms that drive spatial variation in microbiome biodiversity is challenging and  
460 beyond the scope of this study, our results strongly suggest that spatial variation must be  
461 considered when evaluating aspects of microbiome biodiversity, especially for rectal  
462 microbiomes.

463

#### 464 **Effects of host species or guild on biodiversity of oral microbiomes**

465 Within each host guild, species-specific differences characterized biodiversity of oral  
466 microbiomes. In contrast, guild-specific differences did not characterize oral microbiomes (Table  
467 3). This combination of results indicates that oral microbiome biodiversity is unrelated to host  
468 diet for Puerto Rican bats. For carnivores, nearly all pairwise comparisons of oral microbiome  
469 biodiversity between host species were significant (Table S1), suggesting distinct oral  
470 microbiome biodiversity for each carnivorous species. In contrast, pairwise differences in oral  
471 microbiome biodiversity among herbivorous bat species were primarily driven by differences  
472 between *M. redmani* (most diverse oral microbiome) and other herbivores.

473       Patterns of oral microbiome biodiversity may be structured by processes similar to those  
474 of microbiomes from other mucosal surfaces (e.g. nose, mouth, vagina, lungs, gastrointestinal  
475 tract). The microbiome of the mucosal lining of the intestines directly interacts with the host  
476 immune system through receptors in the intestinal epithelia [58]. The direct sampling of the  
477 intestinal mucosa showed a strong relationship between intestinal microbiome composition and  
478 host phylogeny in Belizean bats [14]. The species-specific biodiversity observed for oral  
479 microbiomes within each guild of bats in Puerto Rico likely represents a similar co-evolutionary  
480 association between hosts and their microbiomes. The carnivores represent 3 families of bats  
481 (Mormoopidae, Vespertilionidae, and Noctilionidae), which likely contribute to the

482 preponderance of significant pairwise differences in the biodiversity of oral microbiomes. In  
483 contrast, the lower frequency of pairwise differences in oral microbiome biodiversity among  
484 herbivorous species likely arises because they represent a single family (Phyllostomidae) of bats.

485

#### 486 **Effects of host species or guild on biodiversity of rectal microbiomes**

487 Species-specific differences with host guilds exhibited 2 patterns: (1) species-specific differences  
488 were more consistent at lower sequencing depths than at greater sequencing depths and (2)  
489 species-specific differences were observed more consistently between species of herbivore than  
490 between species of carnivore (Table 3). In contrast, consistent differences in biodiversity  
491 occurred between the rectal microbiomes of carnivorous and herbivorous foraging guilds (Table  
492 3). In concert, these results suggest that the biodiversity of rectal microbiomes is related to host  
493 diet. Regardless of metric, the biodiversity of rectal microbiomes of carnivorous bats (mostly  
494 insectivores) were nearly twice as great as those from herbivorous (mostly frugivores) bats  
495 (Table 1; Fig. 5). Importantly, the lack of species-specific differences in biodiversity within host  
496 foraging guilds in some cases does not suggest that the composition of rectal microbiomes does  
497 not differ among species within a guild. Indeed, microbe composition may differ among host  
498 species within a guild, with different microbe taxa performing the same function in different host  
499 species. However, the number of microbial taxa that a host supports may be contingent on the  
500 general diet of the host species (i.e. the number and kinds of functions a host requires of its  
501 microbiome). This is consistent with findings from a soil and plant microbiome assembly  
502 experiment in which metacommunities contained fixed fractions of coexisting families that were  
503 determined by the available carbon source [59]. Despite consistent higher level (Familial)

504 structure, these assembled microbiomes exhibited great variation in taxonomic composition with  
505 the same functions performed in each microbiome but done so by different confamilial taxa.

506 Microbiomes associated with the digestive system from insectivorous bats are more  
507 biodiverse than their herbivorous counterparts in Guatemala [9], Mexico [13], and Puerto Rico  
508 (Tables 1 and 3). Greater microbiome biodiversity in carnivorous bats contrasts with theory  
509 based on the study of a wide array of mammals (e.g. ruminants, primates, carnivores). Three  
510 general predictions have been postulated [60]: (1) herbivorous hosts should have the most  
511 complex gut morphologies and most diverse microbiomes; (2) carnivorous hosts should have the  
512 most simple gut morphologies and the least biodiverse microbiomes; and (3) omnivorous hosts  
513 should have intermediate levels of gut complexity and microbiome biodiversity. Regardless of  
514 diet, all bats have shorter intestines and shorter food-retention times compared to similarly sized  
515 non-volant mammals as an adaptation for flight [32, 61]. Nonetheless, herbivorous bats still have  
516 slightly larger intestines than do carnivorous counterparts of similar size [62]. In contrast to non-  
517 volant herbivorous mammals that feed primarily on leaves or grass, herbivorous bats generally  
518 consume nectar and fruits that are poor sources of energy and nutrients, and that primarily  
519 contain simple sugars and carbohydrates, resulting in brief retention times (i.e. < 60 minutes)  
520 [63, 64]. Moreover, herbivorous bats rely on paracellular absorption for > 70% of their glucose  
521 absorption, which may explain why these bats have relatively depauperate rectal microbiomes  
522 [32, 65]. In contrast, the high protein, lipid, and nutrient content of insectivorous diets may result  
523 in high microbiome biodiversity due to the variety of carbon and energy sources available [13].

524

525 **Conclusions**

526 High variation in microbiome diversity among individuals of the same species suggests that  
527 individual-level host traits may affect the associated microbiome. Although initial, descriptive  
528 studies may provide new insights from few samples per host species, research designed to  
529 explore the ecological dynamics of microbiomes should account for such variation by increasing  
530 the number of samples collected from host populations. Despite effects of host ecology and  
531 evolutionary history on microbiome biodiversity, microbiome composition and biodiversity are  
532 also affected by spatial phenomena, primarily via host-environment interactions. Future work  
533 should investigate the roles of environmental factors that mediate microbiome biodiversity to  
534 decouple these effects from those associated with host ecology and evolution.

535

536 **Acknowledgments** This work was supported by a Microbiome Research Seed Grant to MRW  
537 and JG from the Office of the Vice President of Research at the University of Connecticut. In  
538 addition, SJP and MRW were supported by the National Science Foundation (DEB-1546686 and  
539 DEB-1831952) and by the Center for Environmental Sciences and Engineering at the University  
540 of Connecticut. We gratefully acknowledge our team of field volunteers, Armando Rodriguez-  
541 Duran for logistical help, and Para la Naturaleza for providing access to the Rio Encantado field  
542 site.

543

#### 544 **REFERENCES**

- 545 1. Gaulke CA, Arnold H.K, Humphreys IR, Kembel SW, O'Dwyer JP, Sharpton TJ (2018)  
546 Ecophylogenetics clarifies the evolutionary association between mammals and their gut  
547 microbiota. mBio 9:e01348-18



- 548 2. Ingala MR, Simmons NB, Perkins SL (2018a) Bats are an untapped system for  
549 understanding microbiome evolution in mammals. *mSphere* 3:e00397-18
- 550 3. Youngblut ND, Reischer GH, Walters W, Schuster N, Walzer C, Stalder G, Ley RE,  
551 Farnleitner AH (2019) Host diet and evolutionary history explain different aspects of gut  
552 microbiome diversity among vertebrate clades. *Nat Commun* 10:2200
- 553 4. McFall-Ngai M, Hadfield MG, Bosch TC, Carey HV, Domazet-Lošo T, Douglas AE,  
554 Dubilier N, Eberl G, Fukami T, Gilbert SF, Hentschel U, King N, Kjelleberg S, Knoll  
555 AH, Kremer N, Mazmanian SK, Metcalf JL, Nealson K, Pierce NE, Rawls JF, Reid A,  
556 Ruby EG, Rumpho M, Sanders JG, Tautz D, Wernegreen JJ (2013) Animals in a bacterial  
557 world, a new imperative for the life sciences. *Proc Natl Acad Sci USA* 110:3229–3236
- 558 5. Blekhman R, Goodrich JK, Huang K, Sun Q, Bukowski R, Bell JT, Spector TD, Keinan  
559 A, Ley RE, Gevers D, Clark AG (2015) Host genetic variation impacts microbiome  
560 composition across human body sites. *Genome Biol* 16:191
- 561 6. Groussin M, Mazel F, Sanders JG, Smillie CS, Lavergne S, Thuiller W, Alm EJ (2017)  
562 Unraveling the processes shaping mammalian gut microbiomes over evolutionary time.  
563 *Nat Commun* 8:14319
- 564 7. Ley RE, Hamady M, Lozupone CA, Turnbaugh PJ, Ramey RR, Bircher JS, Schlegel ML,  
565 Tucker TA, Schrenzel MD, Knight R, Gordon, J.I (2008) *Science* 320:1647–1651
- 566 8. Muegge BD, Kuczynski J, Knights D, Clemente JC, González A, Fontana L, Henrissat B,  
567 Knight R, Gordon JI (2011) Diet convergence in gut microbiome functions across  
568 mammalian phylogeny and within humans. *Science* 332:970–974
- 569 9. Phillips CD, Phelan G, Dowd SE, Mcdonough MM, Ferguson AW, Hanson JD, Siles L,  
570 Ordóñez-Garza N, San Francisco M, Baker RJ (2012) Microbiome analysis among bats

- 571 describes influences of host phylogeny, life history, physiology and geography. *Mol Ecol*  
572 21:2617–2627
- 573 10. Sanders JG, Powell S, Kronauer DJC, Vasconcelos HL, Frederickson ME, Pierce NE  
574 (2014) Stability and phylogenetic correlation in gut microbiota: lessons from ants and  
575 apes. *Mol. Ecol.* 23:1268–1283
- 576 11. Gogarten JF, Davies TJ, Benjamino J, Gogarten JP, Graf J, Mielke A, Mundry R, Nelson  
577 MC, Wittig RM, Leendertz FH, Calvignac-Spencer S (2018) Factors influencing bacterial  
578 microbiome composition in a wild non-human primate community in Taï National Park,  
579 Côte d’Ivoire. *ISME J* 12: 2559–2574
- 580 12. Shanahan T (2011) Phylogenetic inertia and Darwin’s higher law. *Stud Hist Philos Biol*  
581 *Biomed Sci* 42:60–68
- 582 13. Carrillo-Araujo M, Tas N, Alcántara-Hernández RJ, Gaona O, Schondube JE, Medellín  
583 RA Jansson, JK, Falcón LI (2015) Phyllostomid bat microbiome composition is  
584 associated to host phylogeny and feeding strategies. *Front Microbiol* 6:447
- 585 14. Ingala MR, Simmons NB, Wulsch C, Krampis K, Speer KA, Perkins SL (2018)  
586 Comparing microbiome sampling methods in a wild mammal: fecal and intestinal  
587 samples record different signals of host ecology, evolution. *Front Microbiol* 9:803
- 588 15. Lutz HL, Jackson EW, Webala PW, Babyesiza WS, Kerbis Peterhans JC, Demos TC,  
589 Patterson BD, Gilbert JA (2019) Ecology and host identity outweigh evolutionary history  
590 in shaping the bat microbiome. *mSystems* 4:e00511-19
- 591 16. Simmons NB (2005) Order Chiroptera. In: Wilson DE, Reeder DM (eds) *Mammal species*  
592 *of the world: a taxonomic and geographic reference*, third edition, vol. 1. John Hopkins  
593 University Press, pp 312–529

- 594 17. Findley JS (1993) *Bats: a community perspective*. Cambridge University Press.  
595 Cambridge, United Kingdom
- 596 18. Patterson BD, Willig MR, Stevens RD (2003) Trophic strategies, niche partitioning, and  
597 patterns of ecological organization. In Kunz TH, Fenton MB (eds) *Bat Ecology*.  
598 University of Chicago Press, pp 536–579
- 599 19. Fleming TH, Heithaus ER (1981) Frugivorous bats, seed shadows, and the structure of  
600 tropical forests. *Biotropica* 13:45–53
- 601 20. Galindo-González J, Guevara S, Sosa VJ (2000) Bat and bird-generated seed rains at  
602 isolated trees in pastures in a tropical rainforest. *Conserv Biol* 14:1693–1703
- 603 21. Stevens RD, Cox SB, Strauss RD, Willig MR (2003) Broad-scale patterns in functional  
604 diversity across an extensive environmental gradient: vertebrate consumers, hidden  
605 treatments and latitudinal trends. *Ecol Lett* 6:1099–1108
- 606 22. Stevens RD (2004) Untangling latitudinal richness gradients at higher taxonomic levels:  
607 familial perspectives on the diversity of New World bat communities. *J Biogeogr*  
608 31:665–674
- 609 23. Cisneros LM, Fagan ME, Willig MR (2015) Effects of human-modified landscapes on  
610 taxonomic, functional, and phylogenetic dimensions of bat biodiversity. *Divers Distrib*  
611 21:523–533
- 612 24. Presley SJ, Cisneros LM, Klingbeil BT, Willig MR. (2019) Landscape ecology of  
613 mammals. *J Mammal* 100: 1044–1068
- 614 25. Mühldorfer K (2013) Bats and bacterial pathogens: a review. *Zoonoses Public Hlth*  
615 60:93–103

- 616 26. Olival KJ, Hayman DT (2014) Filoviruses in bats: current knowledge and future  
617 directions. *Viruses* 6:1759–1788
- 618 27. Veikkolainen V, Vesterinen EJ, Lilley TM, Pulliainen AT (2014) Bats as reservoir hosts  
619 of human bacterial pathogen, *Bartonella mayotimonensis*. *Emerg Infect Dis* 20:960–967
- 620 28. Brook CE, Dobson AP (2015) Bats as ‘special’ reservoirs for emerging zoonotic  
621 pathogens. *Trends Microbiol* 23:172–180
- 622 29. Olival KJ, Hosseini PR, Zambrana-Torrel C, Ross N, Bogich TL, Daszak P (2017) Host  
623 and viral traits predict zoonotic spillover from mammals. *Nature* 546:646–650
- 624 30. Hahn MB, Gurley ES, Epstein JH, Islam MS, Patz JA, Daszak P, Luby SP (2014) The  
625 role of landscape composition and configuration on *Pteropus giganteus* roosting ecology  
626 and Nipah virus spillover risk in Bangladesh. *Am J Trop Med Hyg* 90:247–255
- 627 31. Fleming TH, Eby P (2003) Ecology of bat migration. In: Kunz TH, Fenton MB (eds) *Bat*  
628 *ecology*. University of Chicago Press, pp 156–208
- 629 32. Caviedes-Vidal C, McWhorter TJ, Lavin SR, Chediack JG, Tracy CR, Karasov WH  
630 (2007) The digestive adaptation of flying vertebrates: high intestinal paracellular  
631 absorption compensates for smaller guts. *Proc Natl Acad Sci USA* 104:19132–19137
- 632 33. Gannon MR, Duran MR, Kurta A, Willig MR (2005) *Bats of Puerto Rico: an Island*  
633 *Focus and Caribbean Perspective*. Texas Tech University Press, Lubbock, Texas
- 634 34. Teeling EC, Springer MS, Madsen O, Bates P, O'Brien SJ, Murphy WJ (2005) A  
635 molecular phylogeny for bats illuminates biogeography and the fossil record. *Science*  
636 307:580–584

- 637 35. Kapil V, Weitzberg E, Lundberg JO, Ahluwalia A (2014) Clinical evidence  
638 demonstrating the utility of inorganic nitrate in cardiovascular health. *Nitric Oxide*  
639 38:45–57
- 640 36. Devine DA, Marsh PD, Meade J (2015) Modulation of host responses by oral commensal  
641 bacteria. *J Oral Microbiol* 7:26941
- 642 37. Marsh PD (2018) In sickness and in health—What does the oral microbiome mean to us?  
643 an ecological perspective. *Adv Dental Res* 29:60–65
- 644 38. Hird SM (2017) Evolutionary biology needs wild microbiomes. *Front Microbiol* 8:725
- 645 39. Rodríguez-Duran A (2009) Bat assemblages in the West Indies: the role of caves. In:  
646 Fleming TH, Racey PA (eds) *Island bats: evolution, ecology, and conservation*.  
647 University of Chicago Press, Chicago, Illinois, pp 265–280
- 648 40. Benjamino J, Beka L, Graf J (2018) *Microbiome Analyses for Toxicological Studies*.  
649 *Curr Prot Toxicol* 77:e53
- 650 41. Caporaso JG, Lauber CL, Walters WA, Berg-Lyons D, Lozupone CA, Turnbaugh PJ  
651 Fierer N, Knight R (2011) Global patterns of 16S rRNA diversity at a depth of millions  
652 of sequences per sample. *Proc Natl Acad Sci USA* 108:4516–4522
- 653 42. R Core Team (2019) *R: a language and environment for statistical computing*. R  
654 Foundation for Statistical Computing, Vienna, Austria. URL <https://www.R-project.org/>
- 655 43. Callahan B, McMurdie P, Holmes S (2019) *dada2: accurate, high-resolution sample*  
656 *inference from amplicon sequencing data*. R Package version 1.14.0.  
657 <https://github.com/benjjneb/-dada2>

- 658 44. Schliep K, Paradis E, Martins LdO, Potts A, White TW, Stachniss C, Kendall M, Halabi  
659 K, Bilderbeek R, Winchell K (2019) phangorn: phylogenetic reconstruction and analysis.  
660 R Package version 2.5.5. <http://cran.rproject.org/web/packages/phangorn>
- 661 45. McMurdie PJ, Holmes S (2019) phyloseq: handling and analysis of high-throughput  
662 microbiome census data. R Package version 1.31.0. <https://github.com/joey711/phyloseq>
- 663 46. Magurran AE (1988) Ecological diversity and its measurement. Princeton University  
664 Press, Princeton, New Jersey
- 665 47. Camargo JA (1993) Must dominance increase with the number of subordinate species in  
666 competitive interactions? *J Theor Biol* 161:537–542
- 667 48. Berger WH, Parker FL 1970. Diversity of planktonic Foraminifera in deep sea sediments.  
668 *Science* 168:1345–1347
- 669 49. Jost L (2006) Entropy and diversity. *Oikos* 113:363–375
- 670 50. Ma Z (2018) Measuring microbiome diversity and similarity with Hill numbers. In:  
671 Nagarajan M (ed) *Metagenomics: perspectives, methods, and applications*. Academic  
672 Press, Cambridge, Massachusetts, pp 157–178
- 673 51. Vengust M, Knapic T, Weese JS (2018) The fecal bacterial microbiota of bats; Slovenia.  
674 *PLoS ONE* 13:e0196728
- 675 52. Brooke AP (1997) Social organization and foraging behaviour of the fishing bat, *Noctilio*  
676 *leporinus* (Chiroptera:Noctilionidae). *Ethology* 103:421–436
- 677 53. Kunz TH, August PV, Burnett CD (1983) Harem social organization in cave roosting  
678 *Artibeus jamaicensis* (Chiroptera: Phyllostomidae). *Biotropica* 15:133-138
- 679 54. Bateman GC, Vaughan TA (1974) Nightly activities of Mormoopid bats. *J Mammal*  
680 55:45–65

- 681 55. Park KJ, Maters E, Altringham JD (1998) Social structure of three sympatric bat species  
682 (Vespertilionidae). *J Zool* 244:379–389
- 683 56. Encarnaç o J.A, Kierdorf U, Holweg D, Jasnoch U, Wolters V (2005) Sex-related  
684 differences in roost-site selection by Daubenton’s bats *Myotis daubentonii* during the  
685 nursery period. *Mammal Rev* 35:285–294
- 686 57. Lopez JE, Vaughan C (2007) Food niche overlap among Neotropical frugivorous bats in  
687 Costa Rica. *Rev Biol Trop* 55:301–313
- 688 58. Igartua C, Davenport ER, Gilad Y, Nicolae DL, Pinto J, Ober C (2017) Host genetic  
689 variation in mucosal immunity pathways influences the upper airway microbiome.  
690 *Microbiome* 5:1–17
- 691 59. Goldford JE, Nanxi L, Bajić D, Estrela S, Tikhonov M, Sanchez-Grostitiaga A, Segr e D,  
692 Mehta P, Sanchez A (2018) Emergent simplicity in microbial community assembly.  
693 *Science* 361:469–474
- 694 60. Ley RE, Lozupone CA, Hamady M, Knight R, Gordon JI (2008) Worlds within worlds:  
695 evolution of the vertebrate gut microbiota. *Nat Rev Microbiol* 6:776–788
- 696 61. Price ER, Brun A, Caviedes-Vidal E, Karasov WH (2015) Digestive adaptations of aerial  
697 lifestyles. *Physiology* 30:69–78
- 698 62. Speakman, J.R. & Thomas, D.W. (2003) Physiological ecology and energetics of bats. In:  
699 T.H. Kunz TH, M.B. Fenton MB (eds) *Bat ecology*. University of Chicago Press,  
700 Chicago, Illinois, pp 430–490
- 701 63. Herrera M, LG, Mart nez Del R o C (1998) Pollen digestion by new world bats: effects of  
702 processing time and feeding habits. *Ecology* 79:2828–2838

- 703 64. Schondube JE, Herrera-M LG, Martínez del Río C (2001) Diet and the evolution of  
704 digestion and renal function in phyllostomid bats. *Zoology* 104:59–73
- 705 65. Caviedes-Vidal C, Karasov WH, Chediack JG, Fasulo V, Cruz-Neto AP, Otani L (2008)  
706 Paracellular absorption: a bat breaks the mammal paradigm. *PloS ONE* 1:e1425
- 707



708 **Figure Legends**

709 **Fig. 1** Hierarchical design of statistical analyses. Yellow shapes indicate analyses: circle,  
710 General Linear Mixed-Effects Model (GLMM); square, Analysis of Variance (ANOVA).  
711 Numbers indicate particular statistical analyses that compare groups: 1, guilds; 2 herbivorous  
712 species; 3, carnivorous species; and 4-11, combinations of sex and cave or only sex for each  
713 species. Numbers in parentheses equal the number of treatment levels in a factor. Abbreviations  
714 are: Arja, *Artibeus jamaicensis*; Brca, *Brachyphylla cavernarum*; Erses, *Erophylla sezekorni*;  
715 More, *Monophyllus redmani*; Stru, *Stenoderma rufum*; Mobl, *Mormoops blainvillii*; Ptpa,  
716 *Pteronotus parnellii*; Ptqu, *Pteronotus quadridens*; Nole, *Noctilio leporinus*; and Epfu, *Eptesicus*  
717 *fuscus*. Only 1 sample was collected from *S.rufum*; therefore, this species was omitted from the  
718 interspecific comparison within the herbivore guild.

719 **Fig. 2** Map of the Caribbean showing the location of Puerto Rico within the Antilles as well as  
720 the location of the three collection localities in Puerto Rico.

721 **Fig. 3** Aspects of biodiversity (richness, black bars; Shannon diversity, dark gray bars;  
722 Camargo's evenness, light gray bars; Berger-Parker dominance, white bars) expressed as Hill  
723 numbers based separately on oral and rectal microbiomes for *Artibeus jamaicensis* at each of  
724 three sites (i.e. Aguas Buenas, Mata de Plátano, and Río Encantado) at sequencing depths of  
725 1,000, 5,000, or 10,000 reads. In general, metrics of biodiversity for oral microbiomes were least  
726 at Mata de Plátano compared to other sites. For rectal microbiomes, only richness differed  
727 among sites, with Río Encantado exhibiting the greatest biodiversity. See Table 1 for details.

728 **Fig. 4** Aspects of biodiversity (richness, black bars; Shannon diversity, dark gray bars;  
729 Camargo's evenness, light gray bars; Berger-Parker dominance, white bars) expressed as Hill  
730 numbers based separately on oral and rectal microbiomes for *Brachyphylla cavernarum*,

731 *Erophylla sezekorni*, and *Pteronotus quadridens* from each of two sites (i.e. Mata de Plátano and  
732 Río Encantado) at sequencing depths of 1,000, 5,000, or 10,000 reads. No significant differences  
733 between sites characterized the aspects of biodiversity of the oral microbiome, whereas aspects  
734 of rectal microbiome biodiversity were generally greater at Río Encantado than at Mata de  
735 Plátano. See Table 1 for details.

736 **Fig. 5** Aspects of biodiversity (richness, black bars; Shannon diversity, dark gray bars;  
737 Camargo's evenness, light gray bars; Berger-Parker dominance, white bars) expressed as Hill  
738 numbers based separately on oral and rectal microbiomes for carnivorous and herbivorous bats at  
739 sequencing depths of 1,000, 5,000, or 10,000 reads. In general, metrics of biodiversity did not  
740 differ between foraging guilds for the oral microbiome, whereas metrics of biodiversity were  
741 significantly greater in carnivores than in herbivores for the rectal microbiome. See Table 1 for  
742 details.

743

**Table 1** Mean biodiversity of oral and rectal microbiomes for each of 10 bat species in Puerto Rico as well as for all bats in each of two foraging guilds (carnivores and herbivores) regardless of species. Biodiversity was quantified using each of four metrics based on Amplified Sequence Variants (richness, Shannon diversity, Camargo evenness, Berger-Parker dominance) and expressed as Hill numbers. Guild-level values are bold

| Foraging guild    |                                         | Richness     |              | Shanon diversity |              | Camargo evenness |              | B-P dominance |             |
|-------------------|-----------------------------------------|--------------|--------------|------------------|--------------|------------------|--------------|---------------|-------------|
| Family            | Species (oral, rectal sample sizes)     | Oral         | Rectal       | Oral             | Rectal       | Oral             | Rectal       | Oral          | Rectal      |
| 1,000 reads       |                                         |              |              |                  |              |                  |              |               |             |
| <b>Carnivores</b> |                                         | <b>47.80</b> | <b>66.70</b> | <b>14.18</b>     | <b>21.95</b> | <b>13.66</b>     | <b>20.19</b> | <b>3.28</b>   | <b>4.65</b> |
| Mormoopidae       |                                         |              |              |                  |              |                  |              |               |             |
|                   | <i>Mormoops blainvillii</i> (2, 6)      | 60.00        | 35.17        | 6.55             | 11.14        | 10.34            | 9.53         | 1.57          | 3.46        |
|                   | <i>Pteronotus parnellii</i> (7, 11)     | 106.29       | 91.36        | 31.00            | 24.66        | 31.55            | 24.80        | 5.43          | 4.40        |
|                   | <i>Pteronotus quadridens</i> (8, 8)     | 78.63        | 92.63        | 26.91            | 44.65        | 26.67            | 37.73        | 5.13          | 8.76        |
| Noctilionidae     |                                         |              |              |                  |              |                  |              |               |             |
|                   | <i>Noctilio leporinus</i> (12, 11)      | 24.67        | 51.64        | 7.00             | 15.92        | 5.55             | 13.87        | 2.74          | 4.49        |
| Vespertilionidae  |                                         |              |              |                  |              |                  |              |               |             |
|                   | <i>Eptesicus fuscus</i> (11, 10)        | 11.18        | 54.30        | 2.75             | 13.94        | 2.26             | 14.43        | 1.48          | 2.54        |
| <b>Herbivores</b> |                                         | <b>32.93</b> | <b>31.17</b> | <b>10.57</b>     | <b>7.01</b>  | <b>8.94</b>      | <b>6.83</b>  | <b>3.17</b>   | <b>2.20</b> |
| Phyllostomidae    |                                         |              |              |                  |              |                  |              |               |             |
|                   | <i>Artibeus jamaicensis</i> (51, 61)    | 24.90        | 22.25        | 7.81             | 4.36         | 6.29             | 4.12         | 2.92          | 1.80        |
|                   | <i>Brachyphylla cavernarum</i> (20, 19) | 29.35        | 41.47        | 8.38             | 8.62         | 6.72             | 8.15         | 3.04          | 2.63        |
|                   | <i>Erophylla sezekorni</i> (10, 26)     | 52.20        | 32.65        | 18.09            | 7.98         | 15.59            | 8.17         | 4.31          | 2.23        |
|                   | <i>Monophyllus redmani</i> (14, 4)      | 54.57        | 88.50        | 18.86            | 29.94        | 17.38            | 28.84        | 3.54          | 5.61        |
|                   | <i>Stenoderma rufum</i> (1, 1)          | 18.00        | 112.00       | 4.52             | 20.93        | 3.51             | 24.89        | 1.96          | 3.76        |

744

745

**Table 1** Continued

| Foraging guild                          |              |               |                  |              |                   |              |               |             |
|-----------------------------------------|--------------|---------------|------------------|--------------|-------------------|--------------|---------------|-------------|
| Family                                  | Richness     |               | Shanon diversity |              | Carmargo evenness |              | B-P dominance |             |
|                                         | Oral         | Rectal        | Oral             | Rectal       | Oral              | Rectal       | Oral          | Rectal      |
| Species (oral, rectal sample sizes)     | 5,000 reads  |               |                  |              |                   |              |               |             |
| <b>Carnivores</b>                       | <b>61.62</b> | <b>122.93</b> | <b>11.39</b>     | <b>24.98</b> | <b>12.25</b>      | <b>25.63</b> | <b>2.67</b>   | <b>4.60</b> |
| Mormoopidae                             |              |               |                  |              |                   |              |               |             |
| <i>Mormoops blainvillii</i> (0, 2)      | --           | 22.50         | --               | 1.94         | --                | 1.90         | --            | 1.16        |
| <i>Pteronotus parnellii</i> (5, 9)      | 200.40       | 170.00        | 40.05            | 29.45        | 44.64             | 32.72        | 4.60          | 4.72        |
| <i>Pteronotus quadridens</i> (2, 1)     | 180.93       | 329.00        | 34.64            | 149.16       | 40.40             | 123.14       | 5.08          | 25.51       |
| Noctilionidae                           |              |               |                  |              |                   |              |               |             |
| <i>Noctilio leporinus</i> (11, 8)       | 33.00        | 96.25         | 5.91             | 18.96        | 4.79              | 18.24        | 2.42          | 4.83        |
| Vespertilionidae                        |              |               |                  |              |                   |              |               |             |
| <i>Eptesicus fuscus</i> (11, 9)         | 16.09        | 99.00         | 2.77             | 17.19        | 2.31              | 19.55        | 1.48          | 2.70        |
| <b>Herbivores</b>                       | <b>43.59</b> | <b>49.03</b>  | <b>9.68</b>      | <b>7.03</b>  | <b>8.44</b>       | <b>7.62</b>  | <b>2.94</b>   | <b>2.11</b> |
| Phyllostomidae                          |              |               |                  |              |                   |              |               |             |
| <i>Artibeus jamaicensis</i> (46, 53)    | 32.61        | 38.98         | 8.24             | 6.13         | 6.69              | 7.13         | 2.98          | 1.62        |
| <i>Brachyphylla cavernarum</i> (18, 14) | 46.17        | 75.29         | 8.63             | 9.08         | 7.07              | 10.10        | 3.10          | 2.52        |
| <i>Erophylla sezekorni</i> (8, 24)      | 57.75        | 48.71         | 5.28             | 9.38         | 6.16              | 10.53        | 1.81          | 2.28        |
| <i>Monophyllus redmani</i> (9, 1)       | 82.89        | 86.00         | 23.67            | 24.37        | 22.69             | 23.84        | 3.46          | 4.66        |
| <i>Stenoderma rufum</i> (1, 1)          | 35.00        | 185.00        | 4.63             | 24.41        | 3.69              | 30.04        | 2.94          | 4.01        |

746

747

**Table 1** Continued

| Foraging guild                          |              |               |                  |              |                   |              |               |             |
|-----------------------------------------|--------------|---------------|------------------|--------------|-------------------|--------------|---------------|-------------|
| Family                                  | Richness     |               | Shanon diversity |              | Carmargo evenness |              | B-P dominance |             |
|                                         | Oral         | Rectal        | Oral             | Rectal       | Oral              | Rectal       | Oral          | Rectal      |
| Species (oral, rectal sample sizes)     | 10,000 reads |               |                  |              |                   |              |               |             |
| <b>Carnivores</b>                       | <b>66.62</b> | <b>153.24</b> | <b>11.04</b>     | <b>22.02</b> | <b>12.20</b>      | <b>25.12</b> | <b>2.64</b>   | <b>3.70</b> |
| Mormoopidae                             |              |               |                  |              |                   |              |               |             |
| <i>Mormoops blainvillii</i> (0, 1)      | --           | 28.00         | --               | 2.59         | --                | 2.34         | --            | 1.28        |
| <i>Pteronotus parnellii</i> (1, 7)      | 231.75       | 225.43        | 45.76            | 30.80        | 50.68             | 36.56        | 6.42          | 4.47        |
| <i>Pteronotus quadridens</i> (4, 0)     | 208.00       | --            | 10.79            | --           | 38.08             | --           | 1.56          | --          |
| Noctilionidae                           |              |               |                  |              |                   |              |               |             |
| <i>Noctilio leporinus</i> (11, 6)       | 36.27        | 113.17        | 5.86             | 15.45        | 4.76              | 16.18        | 2.39          | 4.09        |
| Vespertilionidae                        |              |               |                  |              |                   |              |               |             |
| <i>Eptesicus fuscus</i> (10, 7)         | 19.80        | 133.29        | 2.88             | 21.63        | 2.41              | 24.60        | 1.51          | 2.95        |
| <b>Herbivores</b>                       | <b>42.29</b> | <b>57.35</b>  | <b>7.43</b>      | <b>7.14</b>  | <b>6.35</b>       | <b>7.89</b>  | <b>2.71</b>   | <b>2.11</b> |
| Phyllostomidae                          |              |               |                  |              |                   |              |               |             |
| <i>Artibeus jamaicensis</i> (40, 49)    | 33.48        | 46.92         | 7.74             | 4.95         | 6.33              | 5.18         | 2.85          | 1.86        |
| <i>Brachyphylla cavernarum</i> (17, 12) | 52.76        | 95.58         | 8.73             | 10.08        | 7.17              | 11.38        | 3.05          | 2.70        |
| <i>Erophylla sezekorni</i> (7, 23)      | 66.86        | 53.43         | 5.24             | 9.56         | 6.60              | 10.89        | 1.75          | 2.25        |
| <i>Monophyllus redmani</i> (3, 0)       | 45.33        | --            | 2.00             | --           | 2.25              | --           | 1.43          | --          |
| <i>Stenoderma rufum</i> (1)             | 36.00        | 200.00        | 4.62             | 23.55        | 3.66              | 29.52        | 2.01          | 4.07        |

748

**Table 2** Results ( $P$ -values) of 1-way generalized linear mixed-effects models (for analyses of host sex only with site as a model II treatment factor) or 2-way analyses of variance with type II sums of squares (for analyses of site and host sex) evaluating the effects of site or host sex on microbiome biodiversity. Analyses were conducted separately for each combination biodiversity metric, sample type (oral or rectal), and sequencing depth. Significant results ( $P \leq 0.05$ ) are bold

| Host species                 |                    | Oral microbiomes |       |            | Rectal microbiomes |              |            |
|------------------------------|--------------------|------------------|-------|------------|--------------------|--------------|------------|
| Sequence depth               | Biodiversity index | Site             | Sex   | Site x sex | Site               | Sex          | Site x sex |
| <i>Mormoops blainvillii</i>  |                    |                  |       |            |                    |              |            |
| 1,000                        |                    |                  |       |            |                    |              |            |
|                              | Richness           | --               | --    | --         | --                 | <b>0.001</b> | --         |
|                              | Shannon diversity  | --               | --    | --         | --                 | 0.053        | --         |
|                              | Camargo evenness   | --               | --    | --         | --                 | <b>0.020</b> | --         |
|                              | B-P dominance      | --               | --    | --         | --                 | 0.281        | --         |
| <i>Pteronotus parnellii</i>  |                    |                  |       |            |                    |              |            |
| 1,000                        |                    |                  |       |            |                    |              |            |
|                              | Richness           | --               | 0.368 | --         | --                 | 0.682        | --         |
|                              | Shannon diversity  | --               | 0.359 | --         | --                 | 0.816        | --         |
|                              | Camargo evenness   | --               | 0.397 | --         | --                 | 0.939        | --         |
|                              | B-P dominance      | --               | 0.443 | --         | --                 | 0.648        | --         |
| 5,000                        |                    |                  |       |            |                    |              |            |
|                              | Richness           | --               | 0.561 | --         | --                 | 0.852        | --         |
|                              | Shannon diversity  | --               | 0.714 | --         | --                 | 0.815        | --         |
|                              | Camargo evenness   | --               | 0.709 | --         | --                 | 0.668        | --         |
|                              | B-P dominance      | --               | 0.586 | --         | --                 | 0.953        | --         |
| 10,000                       |                    |                  |       |            |                    |              |            |
|                              | Richness           | --               | --    | --         | --                 | 0.599        | --         |
|                              | Shannon diversity  | --               | --    | --         | --                 | 0.897        | --         |
|                              | Camargo evenness   | --               | --    | --         | --                 | 0.873        | --         |
|                              | B-P dominance      | --               | --    | --         | --                 | 0.867        | --         |
| <i>Pteronotus quadridens</i> |                    |                  |       |            |                    |              |            |
| 1,000                        |                    |                  |       |            |                    |              |            |
|                              | Richness           | --               | 0.097 | --         | <b>0.002</b>       | 0.418        | 0.059      |
|                              | Shannon diversity  | --               | 0.723 | --         | <b>0.001</b>       | <b>0.041</b> | 0.135      |
|                              | Camargo evenness   | --               | 0.492 | --         | <b>0.001</b>       | 0.056        | 0.070      |
|                              | B-P dominance      | --               | 0.574 | --         | <b>0.013</b>       | 0.099        | 0.443      |

749

750

**Table 2** Continued

| Host species               |                    | Oral microbiomes |       |            | Rectal microbiomes |              |            |
|----------------------------|--------------------|------------------|-------|------------|--------------------|--------------|------------|
| Sequence depth             | Biodiversity index | Site             | Sex   | Site x sex | Site               | Sex          | Site x sex |
| <i>Noctilio leporinus</i>  |                    |                  |       |            |                    |              |            |
| 1,000                      |                    |                  |       |            |                    |              |            |
|                            | Richness           | --               | 0.395 | --         | --                 | 0.264        | --         |
|                            | Shannon diversity  | --               | 0.538 | --         | --                 | 0.980        | --         |
|                            | Camargo evenness   | --               | 0.461 | --         | --                 | 0.734        | --         |
|                            | B-P dominance      | --               | 0.911 | --         | --                 | 0.876        | --         |
| 5,000                      |                    |                  |       |            |                    |              |            |
|                            | Richness           | --               | 0.709 | --         | --                 | 0.519        | --         |
|                            | Shannon diversity  | --               | 0.713 | --         | --                 | 0.945        | --         |
|                            | Camargo evenness   | --               | 0.800 | --         | --                 | 0.945        | --         |
|                            | B-P dominance      | --               | 0.487 | --         | --                 | 0.902        | --         |
| 10,000                     |                    |                  |       |            |                    |              |            |
|                            | Richness           | --               | 0.726 | --         | --                 | --           | --         |
|                            | Shannon diversity  | --               | 0.746 | --         | --                 | --           | --         |
|                            | Camargo evenness   | --               | 0.926 | --         | --                 | --           | --         |
|                            | B-P dominance      | --               | 0.316 | --         | --                 | --           | --         |
| <i>Artibeus jamacensis</i> |                    |                  |       |            |                    |              |            |
| 1,000                      |                    |                  |       |            |                    |              |            |
|                            | Richness           | <b>0.049</b>     | 0.697 | 0.161      | <b>0.045</b>       | 0.293        | 0.926      |
|                            | Shannon diversity  | <b>0.001</b>     | 0.947 | 0.146      | 0.476              | <b>0.030</b> | 0.704      |
|                            | Camargo evenness   | <b>0.004</b>     | 0.996 | 0.109      | 0.246              | 0.103        | 0.926      |
|                            | B-P dominance      | <b>0.006</b>     | 0.714 | 0.982      | 0.966              | <b>0.012</b> | 0.246      |
| 5,000                      |                    |                  |       |            |                    |              |            |
|                            | Richness           | 0.169            | 0.406 | 0.113      | <b>0.009</b>       | 0.788        | 0.999      |
|                            | Shannon diversity  | <b>0.007</b>     | 0.965 | 0.150      | 0.319              | <b>0.036</b> | 0.817      |
|                            | Camargo evenness   | <b>0.022</b>     | 0.903 | 0.118      | 0.141              | 0.140        | 0.712      |
|                            | B-P dominance      | <b>0.012</b>     | 0.724 | 0.970      | 0.845              | <b>0.007</b> | 0.624      |
| 10,000                     |                    |                  |       |            |                    |              |            |
|                            | Richness           | 0.364            | 0.211 | 0.205      | <b>0.003</b>       | 0.741        | 0.951      |
|                            | Shannon diversity  | <b>0.016</b>     | 0.525 | 0.254      | 0.230              | <b>0.034</b> | 0.735      |
|                            | Camargo evenness   | 0.065            | 0.454 | 0.214      | 0.098              | 0.139        | 0.695      |
|                            | B-P dominance      | <b>0.016</b>     | 0.922 | 0.911      | 0.725              | <b>0.007</b> | 0.458      |

751

752

**Table 2** Continued

| Host species                   |                    | Oral microbiomes |              |            | Rectal microbiomes |       |              |
|--------------------------------|--------------------|------------------|--------------|------------|--------------------|-------|--------------|
| Sequence depth                 | Biodiversity index | Site             | Sex          | Site x sex | Site               | Sex   | Site x sex   |
| <i>Brachyphylla cavernarum</i> |                    |                  |              |            |                    |       |              |
| 1,000                          |                    |                  |              |            |                    |       |              |
|                                | Richness           | 0.386            | 0.512        | 0.913      | --                 | 0.576 | --           |
|                                | Shannon diversity  | 0.436            | <b>0.027</b> | 0.582      | --                 | 0.881 | --           |
|                                | Camargo evenness   | 0.239            | <b>0.041</b> | 0.777      | --                 | 0.583 | --           |
|                                | B-P dominance      | 0.694            | <b>0.028</b> | 0.536      | --                 | 0.259 | --           |
| 5,000                          |                    |                  |              |            |                    |       |              |
|                                | Richness           | 0.824            | 0.858        | 0.781      | --                 | 0.579 | --           |
|                                | Shannon diversity  | 0.409            | <b>0.014</b> | 0.755      | --                 | 0.794 | --           |
|                                | Camargo evenness   | 0.213            | <b>0.028</b> | 0.990      | --                 | 0.561 | --           |
|                                | B-P dominance      | 0.770            | <b>0.031</b> | 0.616      | --                 | 0.440 | --           |
| 10,000                         |                    |                  |              |            |                    |       |              |
|                                | Richness           | 0.432            | 0.395        | 0.519      | --                 | 0.453 | --           |
|                                | Shannon diversity  | 0.352            | <b>0.020</b> | 0.759      | --                 | 0.653 | --           |
|                                | Camargo evenness   | 0.182            | <b>0.041</b> | 0.939      | --                 | 0.476 | --           |
|                                | B-P dominance      | 0.651            | <b>0.018</b> | 0.827      | --                 | 0.388 | --           |
| <i>Erophylla sezekorni</i>     |                    |                  |              |            |                    |       |              |
| 1,000                          |                    |                  |              |            |                    |       |              |
|                                | Richness           | 0.167            | 0.674        | 0.744      | 0.074              | 0.248 | 0.098        |
|                                | Shannon diversity  | 0.073            | 0.890        | 0.754      | 0.099              | 0.270 | 0.227        |
|                                | Camargo evenness   | 0.072            | 0.970        | 0.812      | 0.066              | 0.251 | 0.151        |
|                                | B-P dominance      | 0.130            | 0.598        | 0.429      | <b>0.045</b>       | 0.107 | 0.263        |
| 5,000                          |                    |                  |              |            |                    |       |              |
|                                | Richness           | --               | 0.392        | --         | 0.078              | 0.194 | 0.093        |
|                                | Shannon diversity  | --               | 0.555        | --         | 0.103              | 0.273 | 0.207        |
|                                | Camargo evenness   | --               | 0.345        | --         | 0.057              | 0.225 | 0.124        |
|                                | B-P dominance      | --               | 0.821        | --         | 0.071              | 0.130 | 0.286        |
| 10,000                         |                    |                  |              |            |                    |       |              |
|                                | Richness           | --               | 0.338        | --         | <b>0.030</b>       | 0.102 | <b>0.025</b> |
|                                | Shannon diversity  | --               | 0.696        | --         | 0.065              | 0.211 | 0.120        |
|                                | Camargo evenness   | --               | 0.325        | --         | <b>0.028</b>       | 0.152 | 0.055        |
|                                | B-P dominance      | --               | 0.495        | --         | 0.061              | 0.122 | 0.222        |

753

754



**Table 2** Continued

| Host species               |                    | Oral microbiomes |       |            | Rectal microbiomes |       |            |
|----------------------------|--------------------|------------------|-------|------------|--------------------|-------|------------|
| Sequence depth             | Biodiversity index | Site             | Sex   | Site x sex | Site               | Sex   | Site x sex |
| <i>Monophyllus redmani</i> |                    |                  |       |            |                    |       |            |
| 1,000                      |                    |                  |       |            |                    |       |            |
|                            | Richness           | 0.059            | 0.782 | 0.700      | --                 | --    | --         |
|                            | Shannon diversity  | 0.088            | 0.448 | 0.467      | --                 | --    | --         |
|                            | Camargo evenness   | 0.085            | 0.540 | 0.555      | --                 | --    | --         |
|                            | B-P dominance      | 2.957            | 0.546 | 0.564      | --                 | --    | --         |
| 5,000                      |                    |                  |       |            |                    |       |            |
|                            | Richness           | 0.113            | 0.969 | 0.841      | --                 | --    | --         |
|                            | Shannon diversity  | 0.164            | 0.707 | 0.735      | --                 | --    | --         |
|                            | Camargo evenness   | 0.160            | 0.824 | 0.829      | --                 | --    | --         |
|                            | B-P dominance      | 0.193            | 0.570 | 0.689      | --                 | --    | --         |
| 10,000                     |                    |                  |       |            |                    |       |            |
|                            | Richness           | --               | --    | --         | --                 | 0.504 | --         |
|                            | Shannon diversity  | --               | --    | --         | --                 | 0.493 | --         |
|                            | Camargo evenness   | --               | --    | --         | --                 | 0.107 | --         |
|                            | B-P dominance      | --               | --    | --         | --                 | 0.681 | --         |

755

756

**Table 3** Results (*P* -values) of general linear mixed-effects models evaluating the effect of host species or host guild on microbiome biodiversity. Effect of host species was evaluated separately for each guild. Species and guild were model I treatment factors (i.e. fixed effects) and cave was a model II treatment factor (i.e. random effects). Analyses were conducted separately for each combination of biodiversity metric, sample type (oral or rectal), and sequencing depth. Significant results (*P* ≤ 0.05) are bold

| Sequencing depth   | Comparison of species within guilds |              |                   |                | Comparison between guilds |                   |
|--------------------|-------------------------------------|--------------|-------------------|----------------|---------------------------|-------------------|
|                    | Oral microbiome                     |              | Rectal microbiome |                | Oral microbiome           | Rectal microbiome |
| Biodiversity index | Carnivores                          | Herbivores   | Carnivores        | Herbivores     |                           |                   |
| 1,000              |                                     |              |                   |                |                           |                   |
| Species richness   | < <b>0.001</b>                      | <b>0.005</b> | 0.116             | < <b>0.001</b> | 0.061                     | < <b>0.001</b>    |
| Shannon diversity  | < <b>0.001</b>                      | <b>0.048</b> | <b>0.009</b>      | < <b>0.001</b> | 0.296                     | < <b>0.001</b>    |
| Camargo evenness   | < <b>0.001</b>                      | <b>0.016</b> | <b>0.029</b>      | < <b>0.001</b> | 0.120                     | < <b>0.001</b>    |
| B-P dominance      | <b>0.002</b>                        | 0.567        | <b>0.006</b>      | < <b>0.001</b> | 0.832                     | < <b>0.001</b>    |
| 5,000              |                                     |              |                   |                |                           |                   |
| Species richness   | < <b>0.001</b>                      | <b>0.008</b> | 0.143             | <b>0.011</b>   | 0.188                     | < <b>0.001</b>    |
| Shannon diversity  | < <b>0.001</b>                      | <b>0.005</b> | < <b>0.001</b>    | 0.064          | 0.691                     | < <b>0.001</b>    |
| Camargo evenness   | < <b>0.001</b>                      | <b>0.003</b> | <b>0.009</b>      | 0.073          | 0.343                     | < <b>0.001</b>    |
| B-P dominance      | < <b>0.001</b>                      | 0.122        | < <b>0.001</b>    | <b>0.024</b>   | 0.367                     | < <b>0.001</b>    |
| 10,000             |                                     |              |                   |                |                           |                   |
| Species richness   | < <b>0.001</b>                      | <b>0.034</b> | 0.363             | <b>0.005</b>   | 0.094                     | < <b>0.001</b>    |
| Shannon diversity  | < <b>0.001</b>                      | <b>0.015</b> | 0.589             | 0.095          | 0.829                     | < <b>0.001</b>    |
| Camargo evenness   | < <b>0.001</b>                      | 0.205        | 0.534             | 0.075          | 0.266                     | < <b>0.001</b>    |
| B-P dominance      | < <b>0.001</b>                      | <b>0.025</b> | 0.575             | <b>0.049</b>   | 0.093                     | < <b>0.001</b>    |

Figure 1

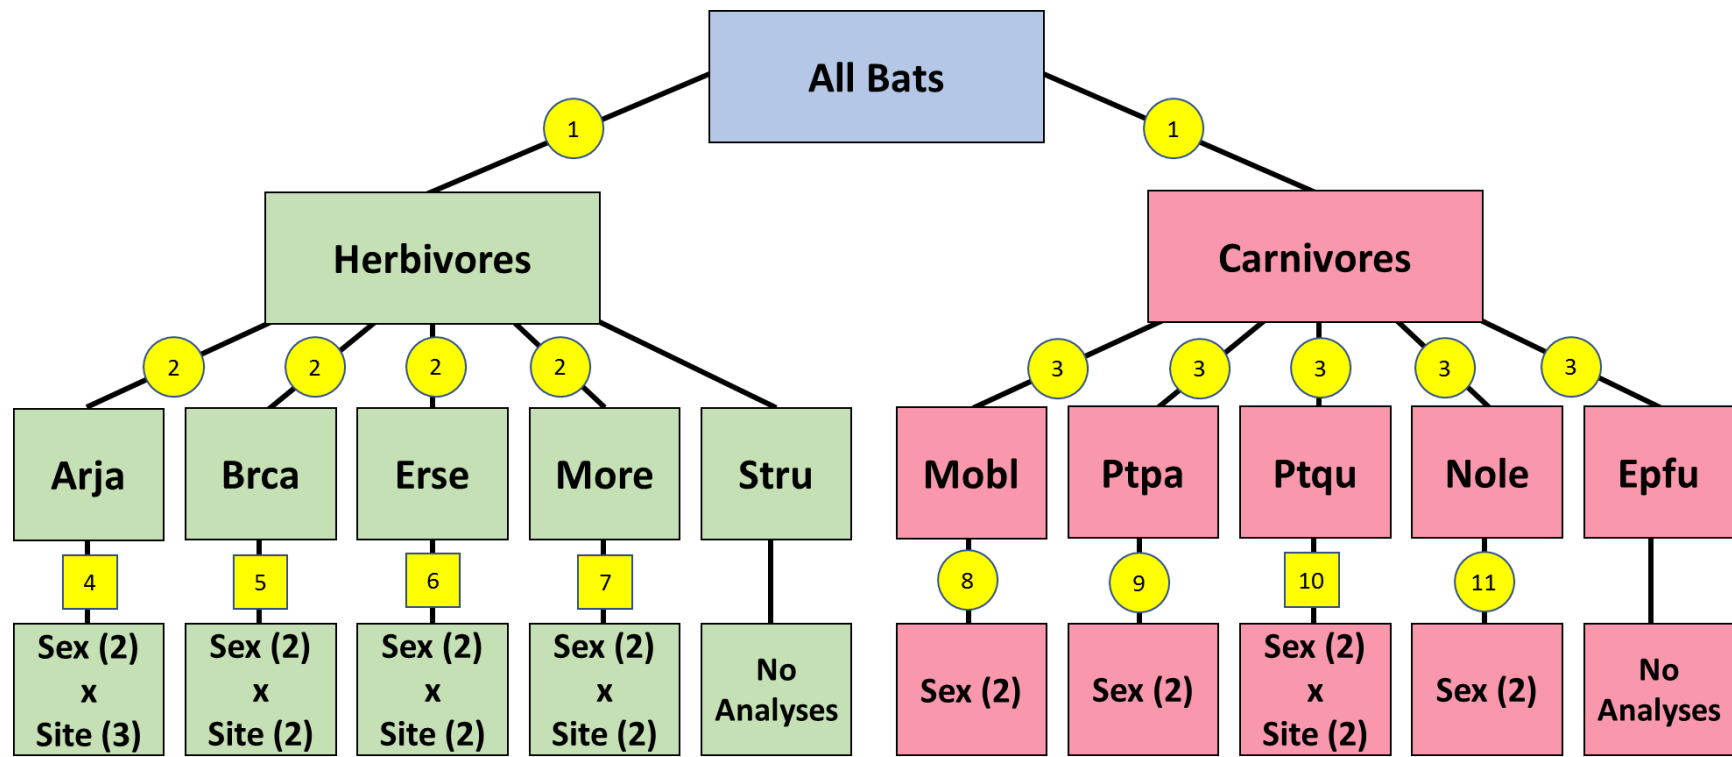

758

Figure 2

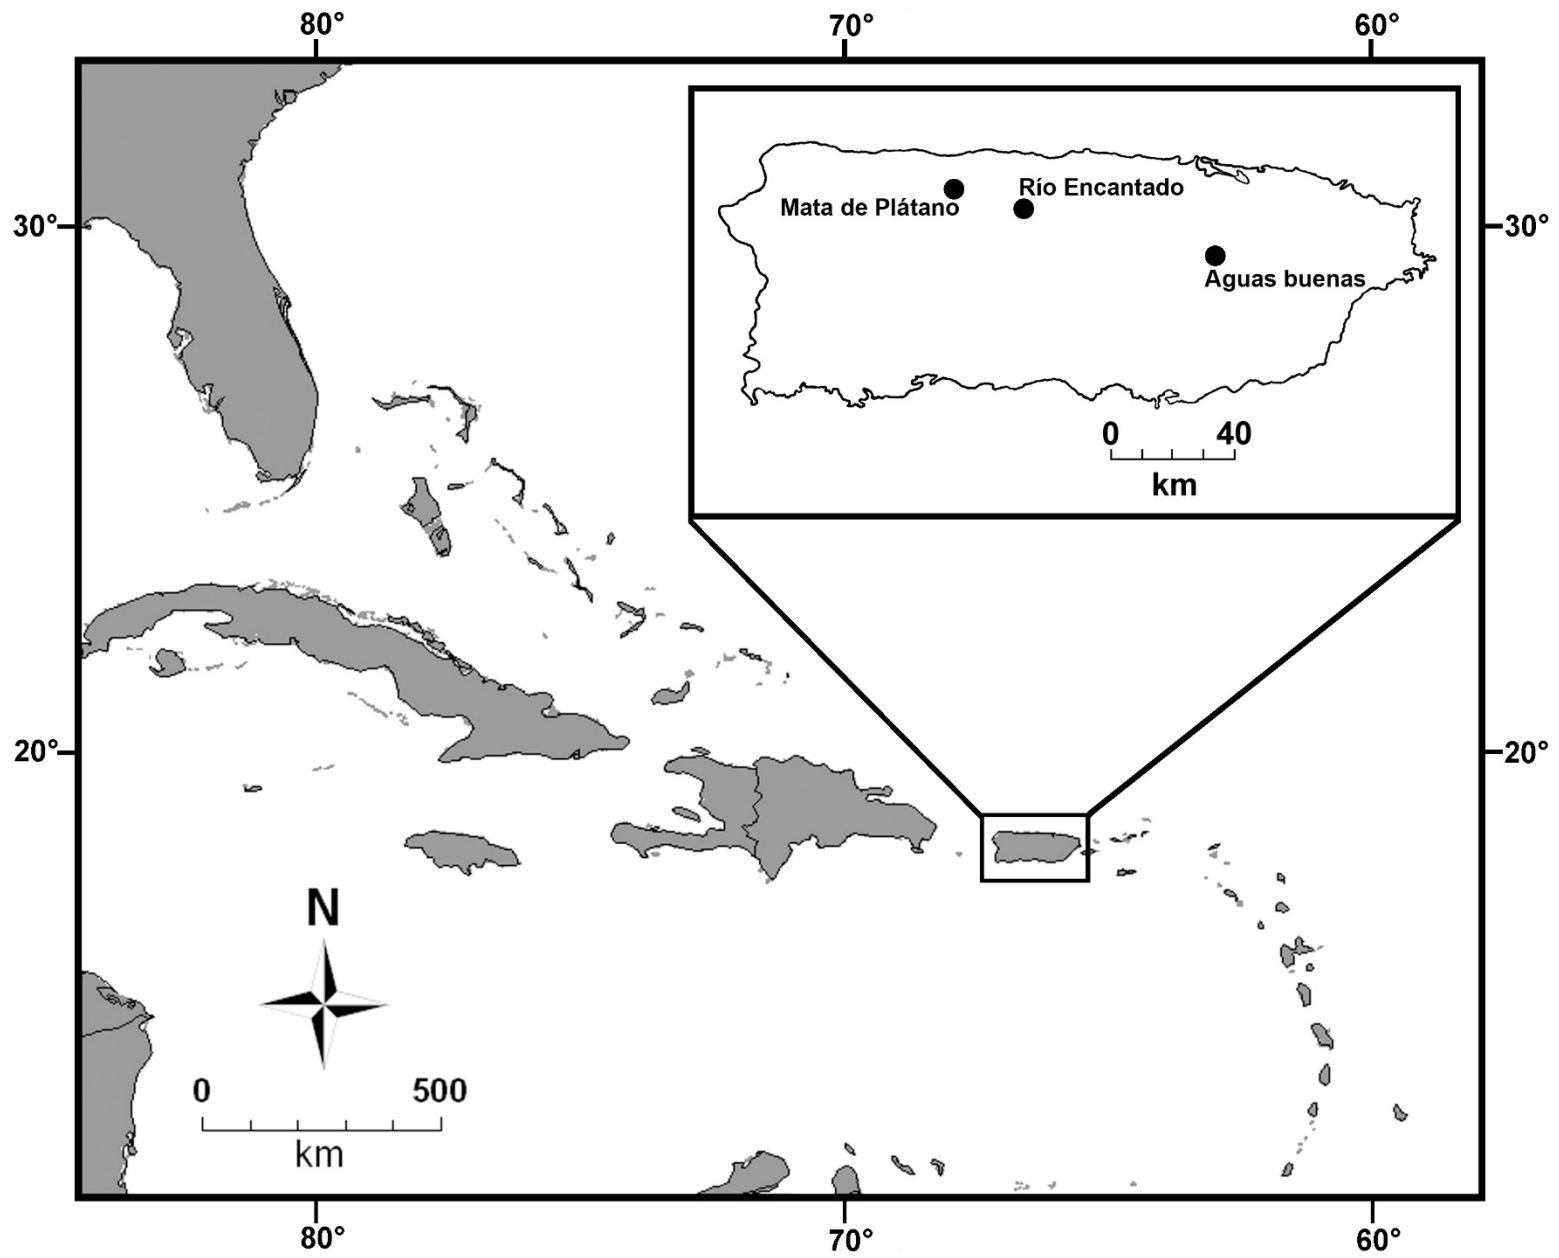

Figure 3

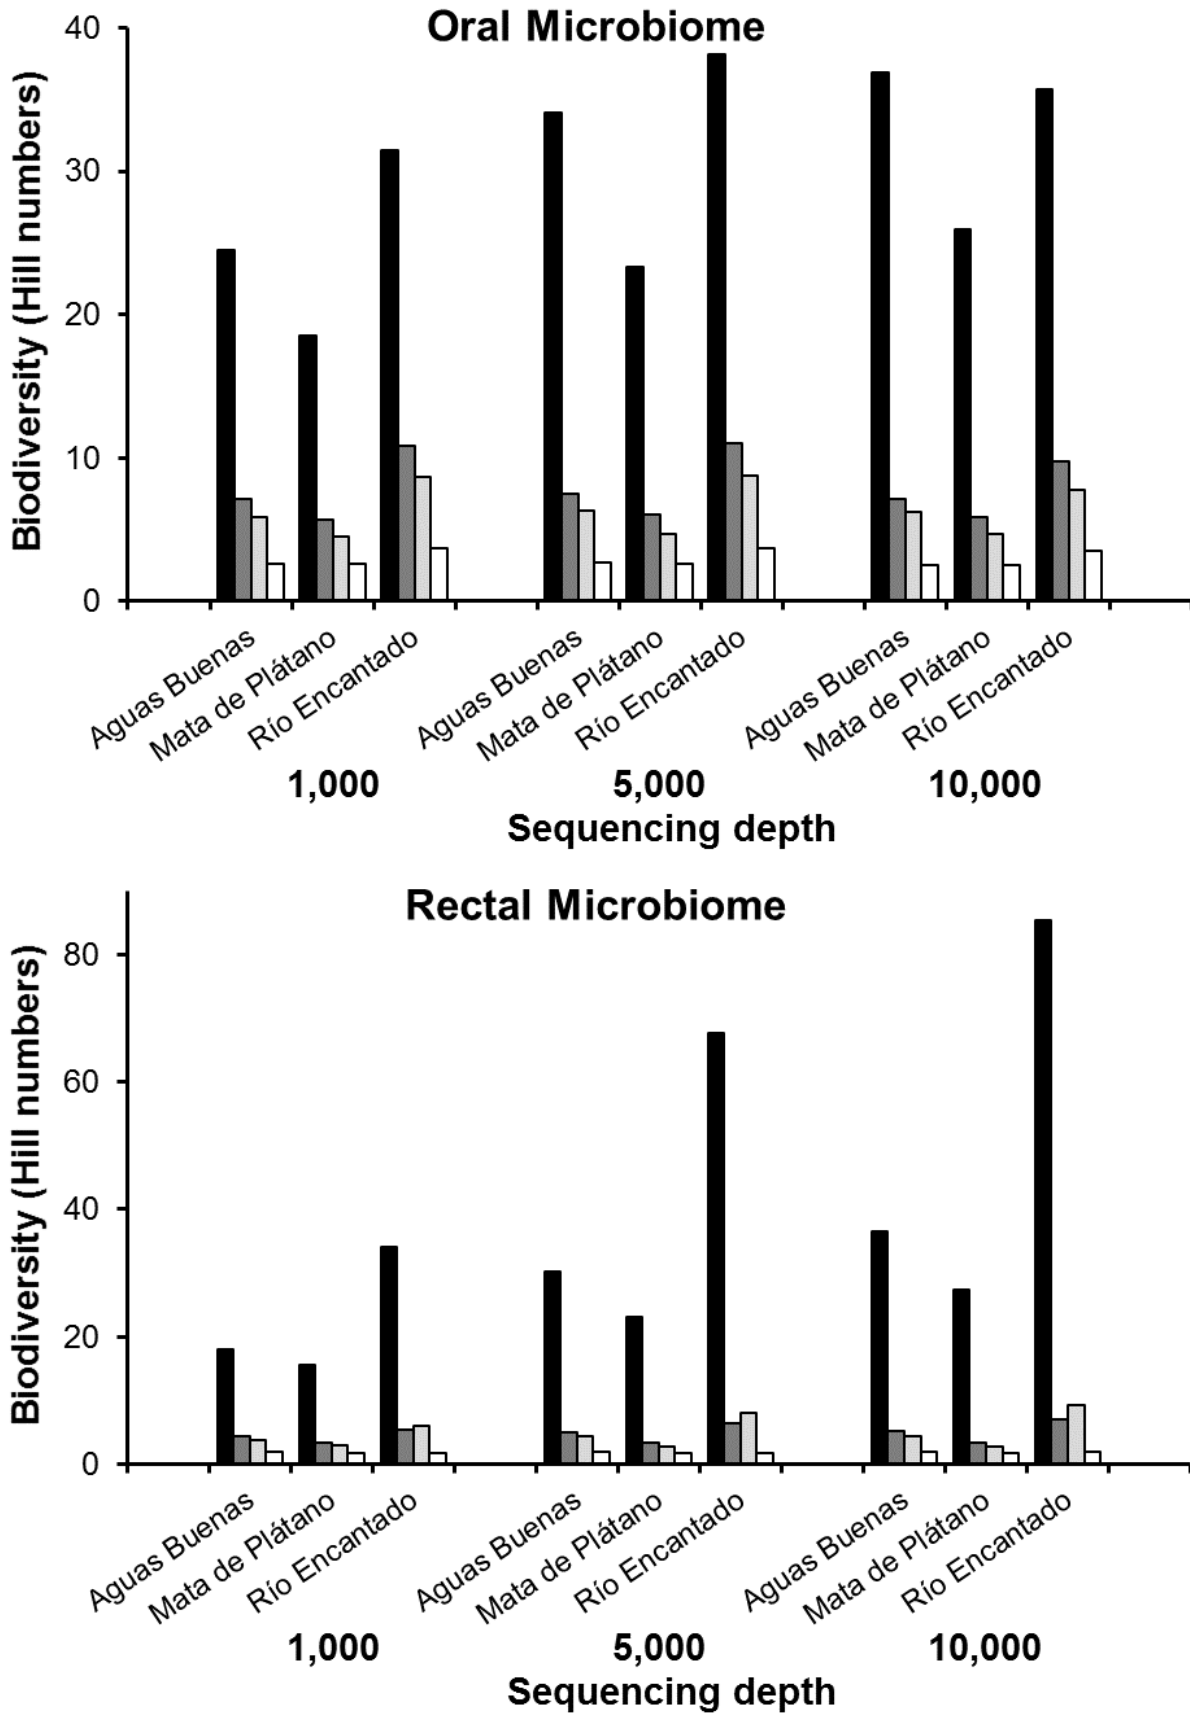

Figure 4

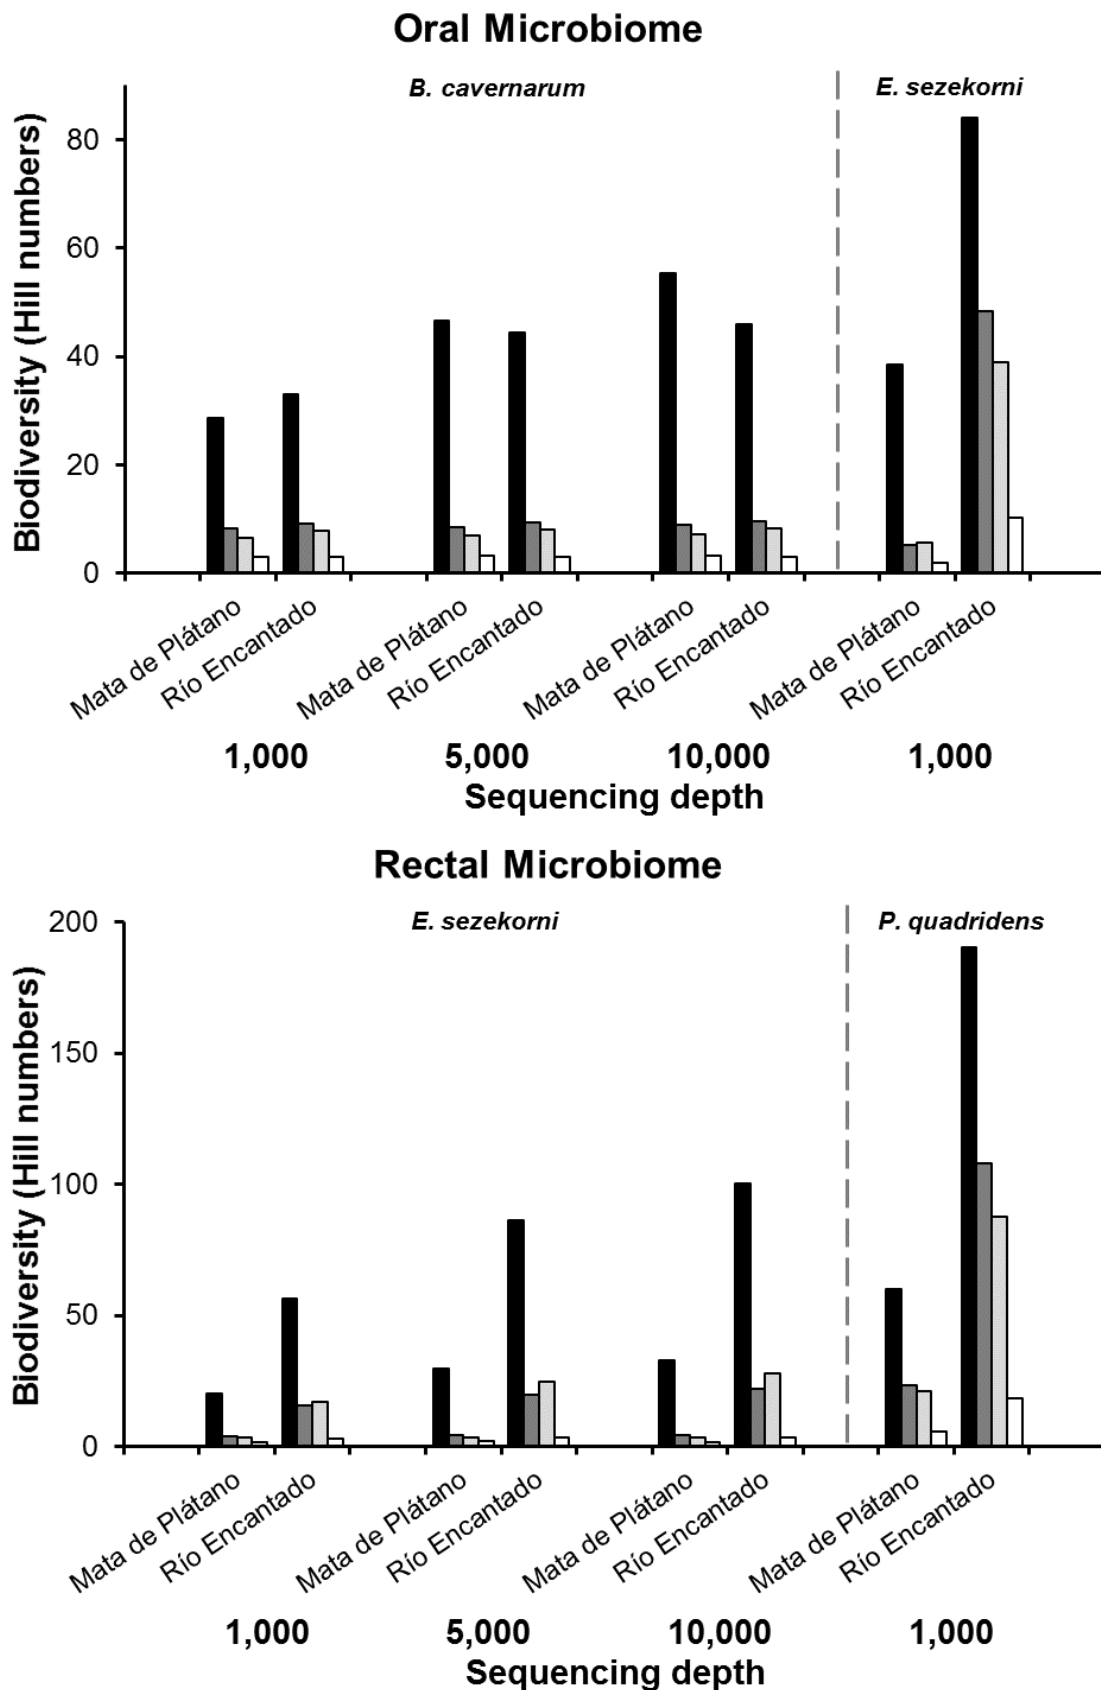

Figure 5

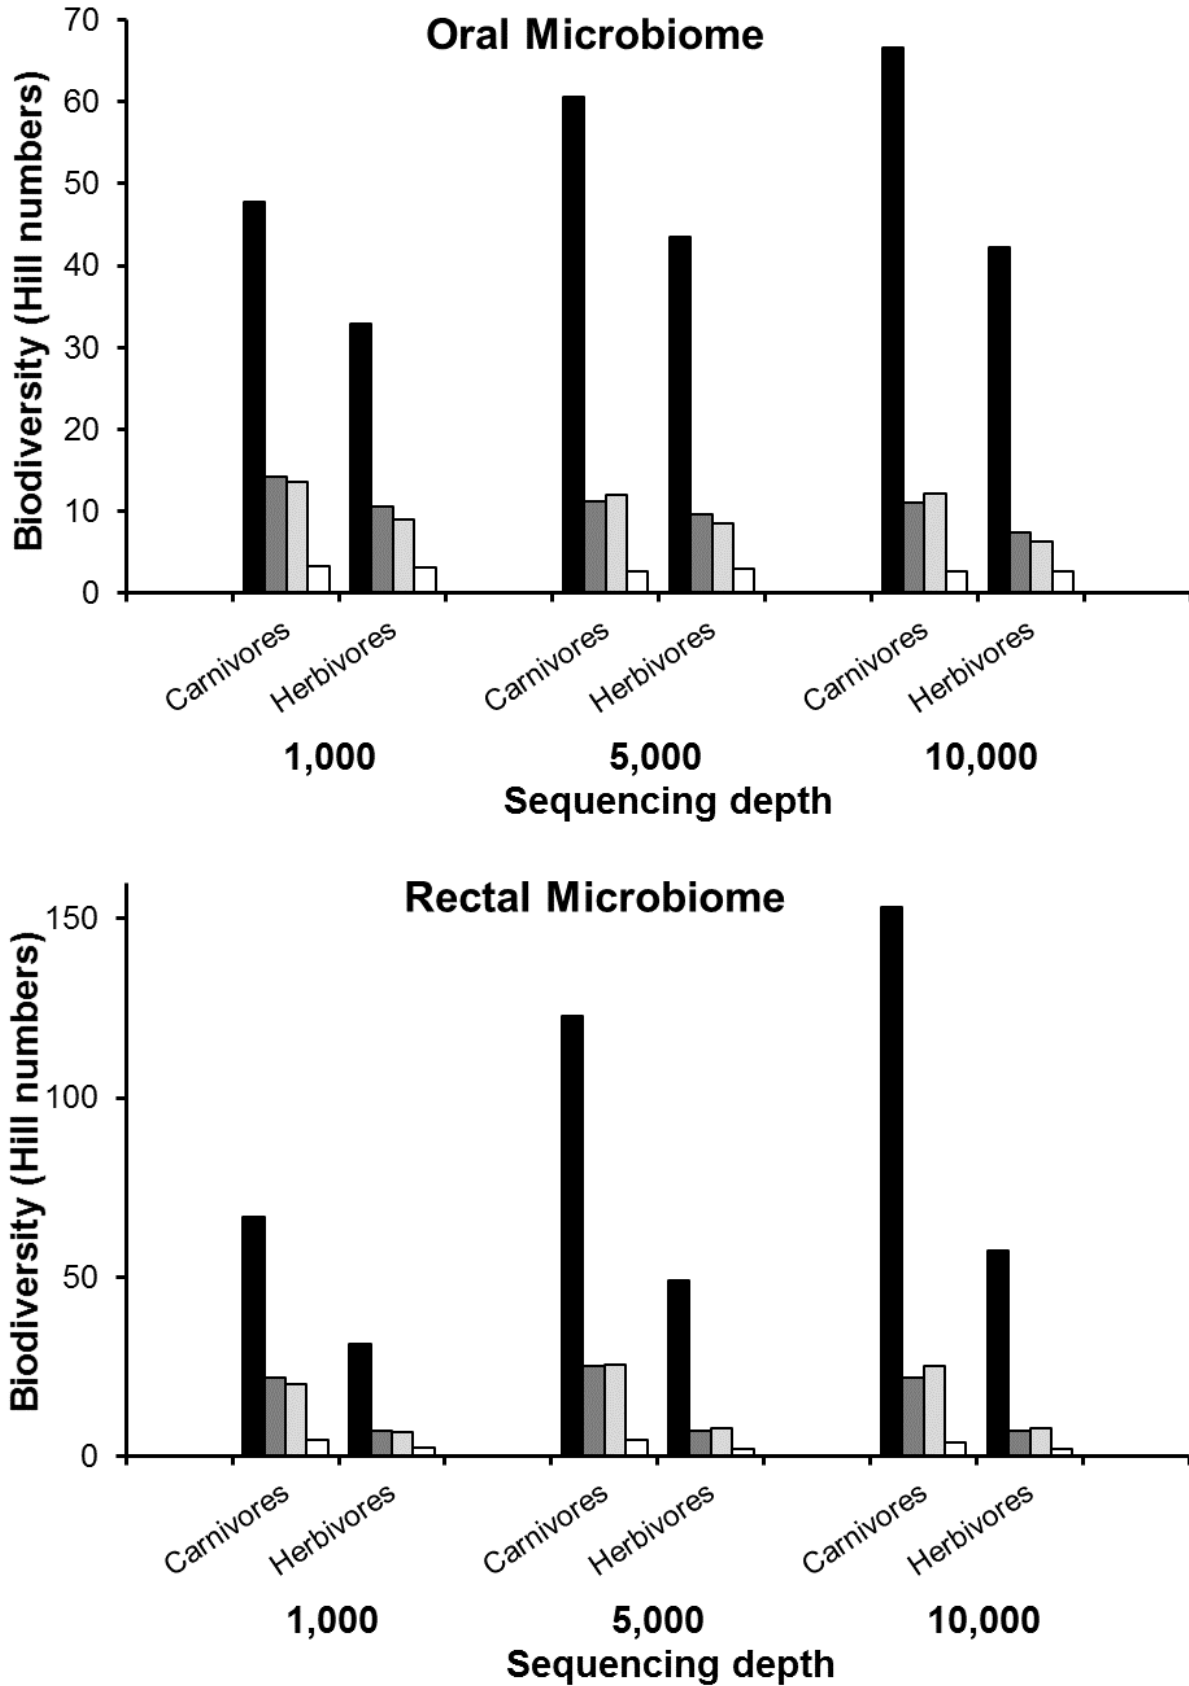

Source: https://www.biorxiv.org/content/10.1101/2020.01.31.928994v1.full.pdf
